# Supplementary material for: Mendelian randomisation analysis of circulating adipokines and C‐reactive protein on breast cancer risk
Source: PubMed Central journal article supplement (PMC7497166; doi:10.1002/ijc.32947), 2020-03-13

## **Mendelian Randomization Analysis of Circulating Adipokines and C-reactive Protein on Breast Cancer Risk**

Timothy Robinson, Richard M Martin, James Yarmolinsky

**Supplementary Table 1.** Estimates of sample overlap across exposure and BCAC datasets

**Supplementary Table 2.** Summary genetic association data used across each adipokine and C-reactive protein

**Supplementary Table 3.** Posterior probabilities under differing hypotheses relating the associations between hepatocyte growth factor and oestrogen receptor-negative breast cancer risk

**Supplementary Table 4.** Effect estimates per unit increase in adiponectin, C-reactive protein, and plasminogen activator inhibitor-1 on overall and oestrogen receptor stratified breast cancer risk using conservative (cis-SNP) instruments

**Supplementary Table 5.** Sensitivity analyses for adiponectin, C-reactive protein, and plasminogen activator inhibitor-1 using MR-Egger and weighted median estimates

**Supplementary Figure 1.** Scatterplot of associations of individual SNPs used to proxy adiponectin with adiponectin and overall breast cancer risk along with slopes obtain from the following models: inverse-variance weighted, MR-Egger, weighted median

**Supplementary Figure 2.** Scatterplot of associations of individual SNPs used to proxy adiponectin with adiponectin and oestrogen receptor-positive breast cancer risk along with slopes obtain from the following models: inverse-variance weighted, MR-Egger, weighted median

**Supplementary Figure 3.** Scatterplot of associations of individual SNPs used to proxy adiponectin with adiponectin and oestrogen receptor-negative breast cancer risk along with slopes obtain from the following models: inverse-variance weighted, MR-Egger, weighted median

**Supplementary Figure 4.** Leave-one-out analysis iteratively removing one SNP from the instrument used to proxy adiponectin and re-calculating the association of adiponectin with overall breast cancer risk

**Supplementary Figure 5.** Leave-one-out analysis iteratively removing one SNP from the instrument used to proxy adiponectin and re-calculating the association of adiponectin with oestrogen receptor-positive breast cancer risk

**Supplementary Figure 6.** Leave-one-out analysis iteratively removing one SNP from the instrument used to proxy adiponectin and re-calculating the association of adiponectin with oestrogen receptor-negative breast cancer risk

**Supplementary Figure 7.** Forest plot presenting individual SNP estimates and multi-allelic instrument estimates for the association of adiponectin with overall breast cancer risk

**Supplementary Figure 8.** Forest plot presenting individual SNP estimates and multi-allelic instrument estimates for the association of adiponectin with oestrogen receptor-positive breast cancer risk

**Supplementary Figure 9.** Forest plot presenting individual SNP estimates and multi-allelic instrument estimates for the association of adiponectin with oestrogen receptor-negative breast cancer risk

**Supplementary Figure 10.** Funnel plot presenting the effect estimate and inverse of the standard error for the causal estimate of each single-nucleotide polymorphism examining the association of adiponectin with overall breast cancer risk along with slopes obtained from inverse-variance weighted and MR-Egger models

**Supplementary Figure 11.** Funnel plot presenting the effect estimate and inverse of the standard error for the causal estimate of each single-nucleotide polymorphism examining the association of adiponectin with oestrogen receptor-positive breast cancer risk along with slopes obtained from inverse-variance weighted and MR-Egger models

**Supplementary Figure 12.** Funnel plot presenting the effect estimate and inverse of the standard error for the causal estimate of each single-nucleotide polymorphism examining the association of adiponectin with oestrogen receptor-negative breast cancer risk along with slopes obtained from inverse-variance weighted and MR-Egger models

**Supplementary Figure 13.** Scatterplot of associations of individual SNPs used to proxy C-reactive protein with C-reactive protein and overall breast cancer risk along with slopes obtain from the following models: inverse-variance weighted, MR-Egger, weighted median

**Supplementary Figure 14.** Scatterplot of associations of individual SNPs used to proxy C-reactive protein with C-reactive protein and oestrogen receptor-positive breast cancer risk along with slopes obtain from the following models: inverse-variance weighted, MR-Egger, weighted median

**Supplementary Figure 15.** Scatterplot of associations of individual SNPs used to proxy C-reactive protein with C-reactive protein and oestrogen receptor-negative breast cancer risk along with slopes obtain from the following models: inverse-variance weighted, MR-Egger, weighted median

**Supplementary Figure 16.** Leave-one-out analysis iteratively removing one SNP from the instrument used to proxy C-reactive protein and re-calculating the association of C-reactive protein with overall breast cancer risk

**Supplementary Figure 17.** Leave-one-out analysis iteratively removing one SNP from the instrument used to proxy C-reactive protein and re-calculating the association of C-reactive protein with oestrogen receptor-positive breast cancer risk

**Supplementary Figure 18.** Leave-one-out analysis iteratively removing one SNP from the instrument used to proxy C-reactive protein and re-calculating the association of C-reactive protein with oestrogen receptor-negative breast cancer risk

**Supplementary Figure 19.** Forest plot presenting individual SNP estimates and multi-allelic instrument estimates for the association of C-reactive protein with overall breast cancer risk

**Supplementary Figure 20.** Forest plot presenting individual SNP estimates and multi-allelic instrument estimates for the association of C-reactive protein with oestrogen receptor-positive breast cancer risk

**Supplementary Figure 21.** Forest plot presenting individual SNP estimates and multi-allelic instrument estimates for the association of C-reactive protein with oestrogen receptor-negative breast cancer risk

**Supplementary Figure 22.** Funnel plot presenting the effect estimate and inverse of the standard error for the causal estimate of each single-nucleotide polymorphism examining the association of C-reactive protein with overall breast cancer risk along with slopes obtained from inverse-variance weighted and MR-Egger models

**Supplementary Figure 23.** Funnel plot presenting the effect estimate and inverse of the standard error for the causal estimate of each single-nucleotide polymorphism examining the association of C-reactive protein with oestrogen receptor-positive breast cancer risk along with slopes obtained from inverse-variance weighted and MR-Egger models

**Supplementary Figure 24.** Funnel plot presenting the effect estimate and inverse of the standard error for the causal estimate of each single-nucleotide polymorphism examining the association of C-reactive protein with oestrogen receptor-negative breast cancer risk along with slopes obtained from inverse-variance weighted and MR-Egger models

**Supplementary Figure 25.** Scatterplot of associations of individual SNPs used to proxy plasminogen activator inhibitor-1 with plasminogen activator inhibitor-1 and overall breast cancer risk along with slopes obtain from the following models: inverse-variance weighted, MR-Egger, weighted median

**Supplementary Figure 26.** Scatterplot of associations of individual SNPs used to proxy plasminogen activator inhibitor-1 with plasminogen activator inhibitor-1 and oestrogen receptor-positive breast cancer risk along with slopes obtain from the following models: inverse-variance weighted, MR-Egger, weighted median

**Supplementary Figure 27.** Scatterplot of associations of individual SNPs used to proxy plasminogen activator inhibitor-1 with plasminogen activator inhibitor-1 and oestrogen receptor-negative breast cancer risk along with slopes obtain from the following models: inverse-variance weighted, MR-Egger, weighted median

**Supplementary Figure 28.** Leave-one-out analysis iteratively removing one SNP from the instrument used to proxy plasminogen activator inhibitor-1 and re-calculating the association of plasminogen activator inhibitor-1 with overall breast cancer risk

**Supplementary Figure 29.** Leave-one-out analysis iteratively removing one SNP from the instrument used to proxy plasminogen activator inhibitor-1 and re-calculating the association of plasminogen activator inhibitor-1 with oestrogen receptor-positive breast cancer risk

**Supplementary Figure 30.** Leave-one-out analysis iteratively removing one SNP from the instrument used to proxy plasminogen activator inhibitor-1 and re-calculating the association of plasminogen activator inhibitor-1 with oestrogen receptor-negative breast cancer risk

**Supplementary Figure 31.** Forest plot presenting individual SNP estimates and multi-allelic instrument estimates for the association of plasminogen activator inhibitor-1 with overall breast cancer risk

**Supplementary Figure 32.** Forest plot presenting individual SNP estimates and multi-allelic instrument estimates for the association of plasminogen activator inhibitor-1 with oestrogen receptor-positive breast cancer risk

**Supplementary Figure 33.** Forest plot presenting individual SNP estimates and multi-allelic instrument estimates for the association of plasminogen activator inhibitor-1 with oestrogen receptor-negative breast cancer risk

**Supplementary Figure 34.** Funnel plot presenting the effect estimate and inverse of the standard error for the causal estimate of each single-nucleotide polymorphism examining the association of plasminogen activator inhibitor-1 with overall breast cancer risk along with slopes obtained from inverse-variance weighted and MR-Egger models

**Supplementary Figure 35.** Funnel plot presenting the effect estimate and inverse of the standard error for the causal estimate of each single-nucleotide polymorphism examining the association of plasminogen activator inhibitor-1 with oestrogen receptor-positive breast cancer risk along with slopes obtained from inverse-variance weighted and MR-Egger models

**Supplementary Figure 36.** Funnel plot presenting the effect estimate and inverse of the standard error for the causal estimate of each single-nucleotide polymorphism examining the association of plasminogen activator inhibitor-1 with oestrogen receptor-negative breast cancer risk along with slopes obtained from inverse-variance weighted and MR-Egger models

**Supplementary Table 1. Estimates of sample overlap across exposure and BCAC datasets**

| <b>Instrument</b>  | <b>Overlapping Cohort</b> | <b>Sample size after QC in BCAC</b> | <b>As a percentage of total BCAC population (228,951)</b> |
|--------------------|---------------------------|-------------------------------------|-----------------------------------------------------------|
| Adiponectin        | NHS                       | 3,392                               | 1.5                                                       |
| C-reactive protein | EPIC                      | 7,057                               | 3.1                                                       |
|                    | WHI                       | 9,521                               | 4.2                                                       |
| Interleukin-6      | EPIC                      | 7,057                               | 3.1                                                       |
|                    | WHI                       | 9,521                               | 4.2                                                       |

QC= Quality control, BCAC= Breast Cancer Association Consortium, NHS = Nurses Health Study, EPIC = European Prospective Investigation into Cancer and Nutrition, WHI = Women's Health Initiative

**Supplementary Table 2. Summary genetic association data used across each adipokine and C-reactive protein**

| <b>Trait</b>       | <b>rsid</b> | <b>Effect allele</b> | <b>Non-effect allele</b> | <b>Effect allele frequency</b> | <b>Beta</b> | <b>SE</b> |
|--------------------|-------------|----------------------|--------------------------|--------------------------------|-------------|-----------|
| Adiponectin        | rs3001032   | T                    | C                        | 0.70                           | -0.02       | 0.004     |
|                    | rs1108842   | C                    | A                        | 0.50                           | 0.03        | 0.004     |
|                    | rs6810075   | T                    | C                        | 0.60                           | 0.06        | 0.004     |
|                    | rs998584    | C                    | A                        | 0.50                           | 0.03        | 0.005     |
|                    | rs2980879   | T                    | A                        | 0.70                           | 0.03        | 0.005     |
|                    | rs7955516   | C                    | A                        | 0.40                           | 0.02        | 0.004     |
|                    | rs601339    | G                    | A                        | 0.20                           | 0.03        | 0.005     |
|                    | rs2925979   | T                    | C                        | 0.30                           | -0.04       | 0.005     |
|                    | rs12922394  | T                    | C                        | 0.10                           | -0.08       | 0.01      |
|                    | rs731839    | G                    | A                        | 0.35                           | -0.03       | 0.004     |
| C-reactive Protein | rs1051338   | G                    | T                        | 0.31                           | 0.024       | 0.004     |
|                    | rs10832027  | G                    | A                        | 0.33                           | -0.026      | 0.004     |
|                    | rs10838687  | G                    | T                        | 0.22                           | -0.031      | 0.004     |
|                    | rs112635299 | T                    | G                        | 0.02                           | -0.107      | 0.017     |
|                    | rs12202641  | T                    | C                        | 0.39                           | -0.023      | 0.004     |
|                    | rs12960928  | C                    | T                        | 0.27                           | 0.024       | 0.004     |
|                    | rs12995480  | T                    | C                        | 0.17                           | -0.031      | 0.005     |
|                    | rs1441169   | G                    | A                        | 0.53                           | -0.025      | 0.004     |
|                    | rs1490384   | T                    | C                        | 0.51                           | -0.025      | 0.004     |
|                    | rs1514895   | A                    | G                        | 0.71                           | -0.027      | 0.004     |
|                    | rs1558902   | A                    | T                        | 0.41                           | 0.034       | 0.004     |
|                    | rs1582763   | A                    | G                        | 0.37                           | -0.022      | 0.004     |
|                    | rs17658229  | C                    | T                        | 0.05                           | 0.056       | 0.010     |
|                    | rs178810    | T                    | C                        | 0.56                           | 0.020       | 0.004     |
|                    | rs1880241   | G                    | A                        | 0.48                           | -0.028      | 0.004     |
|                    | rs2239222   | G                    | A                        | 0.36                           | 0.035       | 0.004     |
|                    | rs2315008   | T                    | G                        | 0.31                           | -0.023      | 0.004     |
|                    | rs2352975   | C                    | T                        | 0.3                            | 0.025       | 0.004     |
|                    | rs2710804   | C                    | T                        | 0.37                           | 0.021       | 0.004     |
|                    | rs2836878   | G                    | A                        | 0.27                           | 0.043       | 0.004     |
|                    | rs2891677   | C                    | T                        | 0.46                           | -0.020      | 0.004     |
|                    | rs4092465   | A                    | G                        | 0.35                           | -0.027      | 0.004     |
|                    | rs4246598   | A                    | C                        | 0.46                           | 0.022       | 0.004     |
|                    | rs469772    | T                    | C                        | 0.19                           | -0.031      | 0.005     |
|                    | rs4774590   | A                    | G                        | 0.35                           | -0.022      | 0.004     |
|                    | rs6001193   | G                    | A                        | 0.35                           | -0.028      | 0.004     |
|                    | rs7121935   | A                    | G                        | 0.38                           | -0.022      | 0.004     |
|                    | rs75460349  | A                    | C                        | 0.97                           | 0.086       | 0.014     |
|                    | rs9271608   | G                    | A                        | 0.22                           | 0.042       | 0.005     |
|                    | rs9284725   | C                    | A                        | 0.24                           | 0.027       | 0.004     |
|                    | rs9385532   | T                    | C                        | 0.33                           | -0.026      | 0.004     |
|                    | rs2293476   | C                    | G                        | 0.23                           | 0.030       | 0.004     |
|                    | rs1805096   | G                    | A                        | 0.39                           | 0.104       | 0.004     |
|                    | rs4129267   | C                    | T                        | 0.39                           | 0.088       | 0.004     |
| rs2794520          | C           | T                    | 0.33                     | 0.182                          | 0.004       |           |
| rs10925027         | T           | C                    | 0.4                      | 0.036                          | 0.004       |           |
| rs1260326          | T           | C                    | 0.39                     | 0.073                          | 0.004       |           |
| rs13409371         | A           | G                    | 0.43                     | 0.048                          | 0.004       |           |

|                 |            |   |   |      |       |       |
|-----------------|------------|---|---|------|-------|-------|
|                 | rs13233571 | C | T | 0.12 | 0.057 | 0.005 |
|                 | rs4841132  | G | A | 0.09 | 0.065 | 0.006 |
|                 | rs340005   | A | G | 0.38 | 0.03  | 0.004 |
|                 | rs10521222 | C | T | 0.05 | 0.104 | 0.011 |
|                 | rs2852151  | A | G | 0.40 | 0.025 | 0.004 |
|                 | rs4420638  | A | G | 0.18 | 0.229 | 0.006 |
|                 | rs1800961  | C | T | 0.03 | 0.112 | 0.011 |
| HGF             | rs5745695  | A | G | 0.76 | 0.19  | 0.03  |
| Interleukin 6   | rs7529229  | T | C | 0.55 | 0.086 | 0.012 |
|                 | rs4845371  | T | C | 0.43 | 0.062 | 0.013 |
|                 | rs12740969 | T | G | 0.49 | 0.078 | 0.013 |
| Leptin receptor | rs3790438  | A | T | 0.18 | -1.37 | 0.02  |
| PAI-I           | rs2227631  | A | G | 0.59 | 0.073 | 0.007 |
|                 | rs6486122  | T | C | 0.69 | 0.046 | 0.007 |
|                 | rs6976053  | T | C | 0.48 | 0.048 | 0.007 |
| Resistin        | rs34124816 | C | A | 0.04 | -0.61 | 0.06  |

SE= Standard error, HGF= Hepatocyte growth factor, PAI-1= Plasminogen activator inhibitor-1. Effect estimates and standard errors are scaled as follows: natural log-transformed adiponectin, C-reactive protein, interleukin-6, and plasminogen activator inhibitor-1 and standardised hepatocyte growth factor, leptin receptor, and resistin.

**Supplementary Table 3. Posterior probabilities under differing hypotheses relating the associations between hepatocyte growth factor and oestrogen receptor-negative breast cancer risk**

| <b>Configuration</b> | <b>H<sub>0</sub></b>  | <b>H<sub>1</sub></b> | <b>H<sub>2</sub></b>  | <b>H<sub>3</sub></b>  | <b>H<sub>4</sub></b>  |
|----------------------|-----------------------|----------------------|-----------------------|-----------------------|-----------------------|
|                      | $7.25 \times 10^{-7}$ | 0.93                 | $1.47 \times 10^{-8}$ | $1.90 \times 10^{-2}$ | $5.50 \times 10^{-2}$ |

H<sub>0</sub> = neither hepatocyte growth factor nor oestrogen receptor-negative breast cancer has a genetic association in the region, H<sub>1</sub> = only hepatocyte growth factor has a genetic association in the region, H<sub>2</sub> = only oestrogen receptor-negative breast cancer has a genetic association in the region, H<sub>3</sub> = both hepatocyte growth factor and oestrogen receptor-negative breast cancer are associated but have different causal variants, H<sub>4</sub> = both hepatocyte growth factor and oestrogen receptor-negative breast cancer are associated and share a single causal variant



**Supplementary Table 4. Effect estimates per unit increase in adiponectin, C-reactive protein, and plasminogen activator inhibitor-1 on overall and oestrogen receptor stratified breast cancer risk using conservative (*cis*-SNP) instruments\***

| Risk factor        | Overall breast cancer | ER+ breast cancer | ER- breast cancer |
|--------------------|-----------------------|-------------------|-------------------|
|                    | OR (95% CI)           | OR (95% CI)       | OR (95% CI)       |
| Adiponectin        | 0.97 (0.92-1.02)      | 0.98 (0.92-1.05)  | 0.98 (0.89-1.09)  |
| C-reactive protein | 1.01 (0.95-1.07)      | 1.02 (0.96-1.10)  | 1.04 (0.94-1.16)  |
| PAI-1              | 1.10 (0.93-1.30)      | 1.16 (0.94-1.42)  | 1.13 (0.83-1.53)  |

SNP = single-nucleotide polymorphism, OR = Odds Ratio, 95% CI = 95% Confidence Interval, PAI-1 = Plasminogen activator inhibitor-1.

\**Cis*-SNP instruments were constructed as follows: adiponectin was instrumented using four variants within *ADIPOQ* (rs6810075, rs16861209, rs17366568, rs3774261), C-reactive protein was instrumented using four variants within *CRP* (rs3093077, rs1205, rs1130864, rs1800947), and plasminogen activator inhibitor-1 was instrumented using one variant within *SERPINE* (rs2227631).

Effect estimates represent the effect of a one unit increase in: natural log-transformed adiponectin, C-reactive protein, and plasminogen activator inhibitor-1.

**Supplementary Table 5. Sensitivity analyses for adiponectin, C-reactive protein, and plasminogen activator inhibitor-1 using MR-Egger and weighted median estimates**

| <b>Trait</b>       | <b>Model</b>                 | <b>Overall Breast cancer<br/>OR (95% CI); P</b> | <b>ER+ Breast cancer<br/>OR (95% CI); P</b> | <b>ER- Breast cancer<br/>OR (95% CI); P</b> |
|--------------------|------------------------------|-------------------------------------------------|---------------------------------------------|---------------------------------------------|
| Adiponectin        | MR-Egger regression          | 1.04 (0.91-1.20);<br>0.53                       | 1.07 (0.93-1.23);<br>0.33                   | 1.03 (0.86-1.23);<br>0.77                   |
|                    | MR-Egger intercept parameter | 1.00 (0.99-1.01);<br>0.83                       | 1.00 (0.99-1.01);<br>0.58                   | 1.00 (0.99-1.01);<br>0.72                   |
|                    | Weighted median estimate     | 1.03 (0.97-1.09);<br>0.35                       | 1.06 (1.00-1.14);<br>0.06                   | 1.07 (0.97-1.18);<br>0.16                   |
| C-reactive protein | MR-Egger regression          | 1.24 (0.55-2.78);<br>0.62                       | 1.27 (0.50-3.24);<br>0.63                   | 0.95 (0.45-1.99);<br>0.89                   |
|                    | MR-Egger intercept parameter | 0.99 (0.96-1.02);<br>0.70                       | 0.99 (0.95-1.03);<br>0.58                   | 1.01 (0.98-1.04);<br>0.54                   |
|                    | Weighted median estimate     | 1.08 (0.91-1.29);<br>0.37                       | 1.02 (0.84-1.25);<br>0.84                   | 0.98 (0.72-1.34);<br>0.92                   |
| PAI-1              | MR-Egger regression          | 0.58 (0.17-2.02);<br>0.55                       | 0.54 (0.22-1.32);<br>0.40                   | 0.50 (0.03-7.71);<br>0.71                   |
|                    | MR-Egger intercept parameter | 1.03 (0.96-1.11);<br>0.53                       | 1.04 (0.98-1.09);<br>0.41                   | 1.04 (0.89-1.22);<br>0.69                   |
|                    | Weighted median estimate     | 0.94 (0.81-1.10);<br>0.46                       | 0.94 (0.78-1.13);<br>0.49                   | 0.90 (0.69-1.18);<br>0.46                   |

ER+ = Oestrogen-receptor positive, ER- = Oestrogen-receptor negative, 95% CI = 95% Confidence Interval, PAI-1 = Plasminogen activator inhibitor-1.

### MR Test

- Inverse variance weighted
- Weighted median
- MR Egger

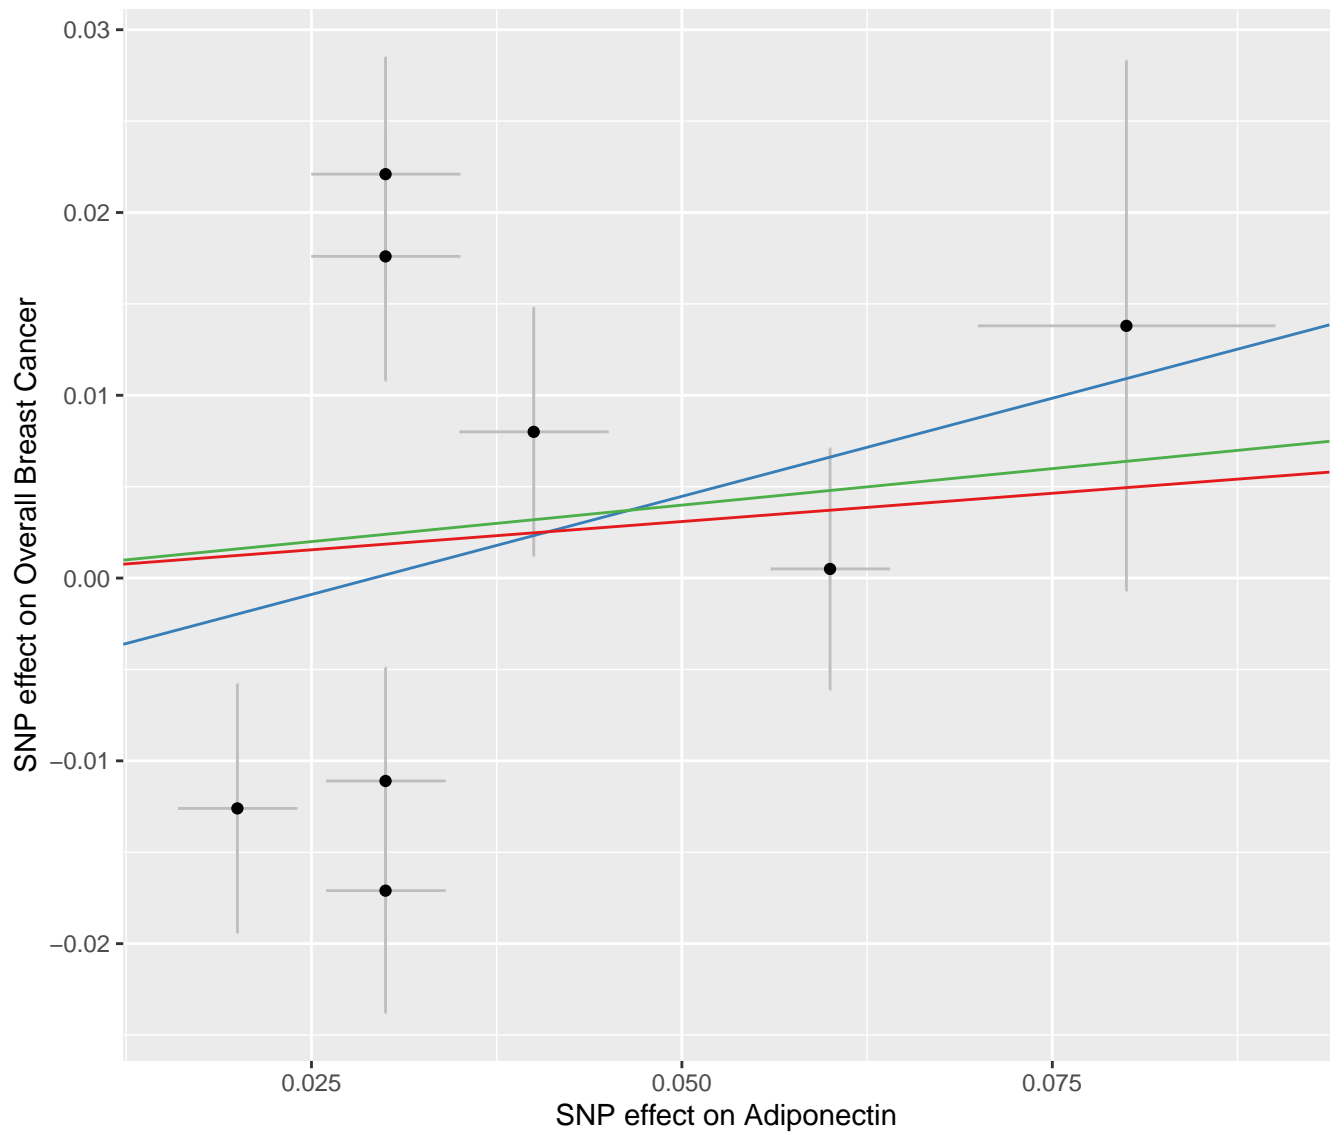

MR Test

- Inverse variance weighted
- Weighted median
- MR Egger

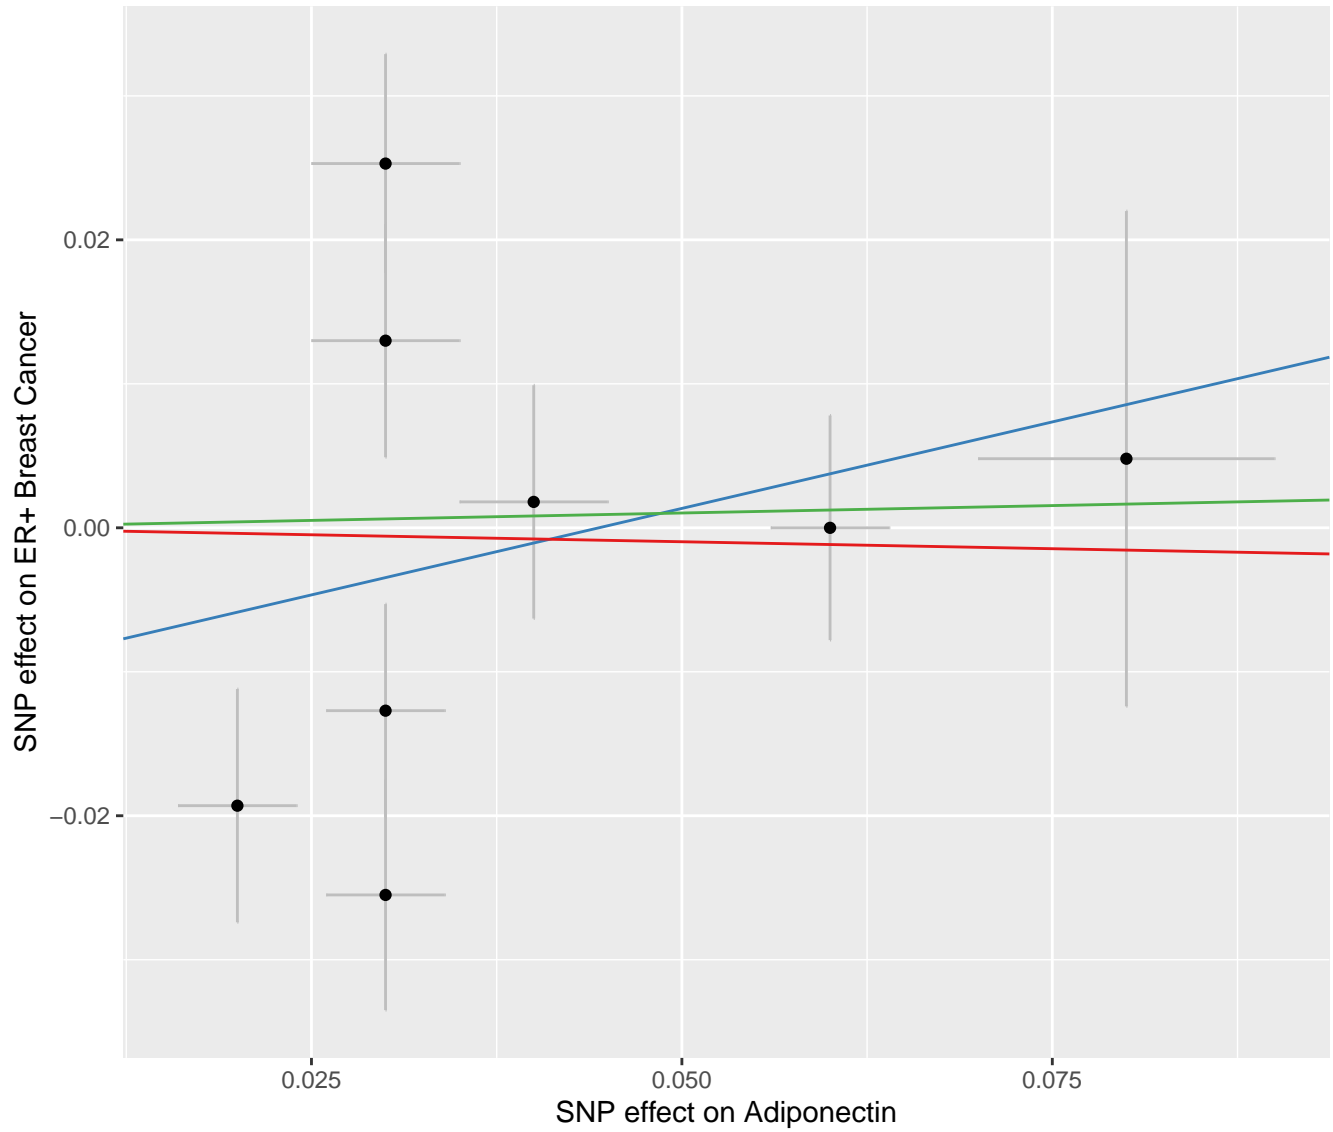

MR Test

- Inverse variance weighted
- Weighted median
- MR Egger

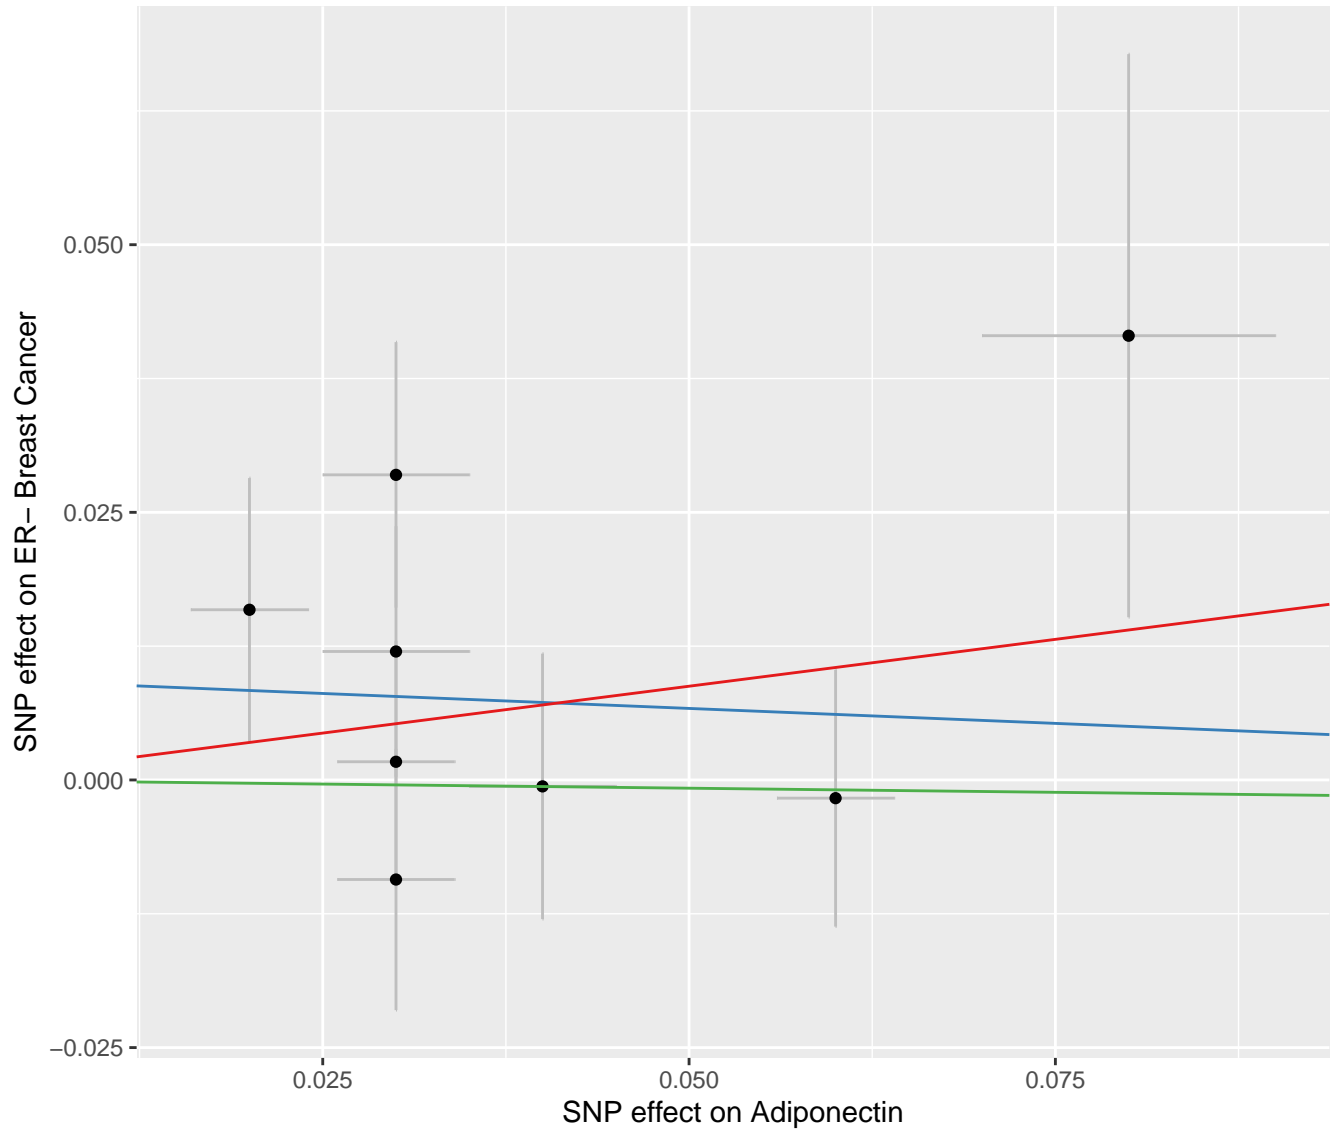

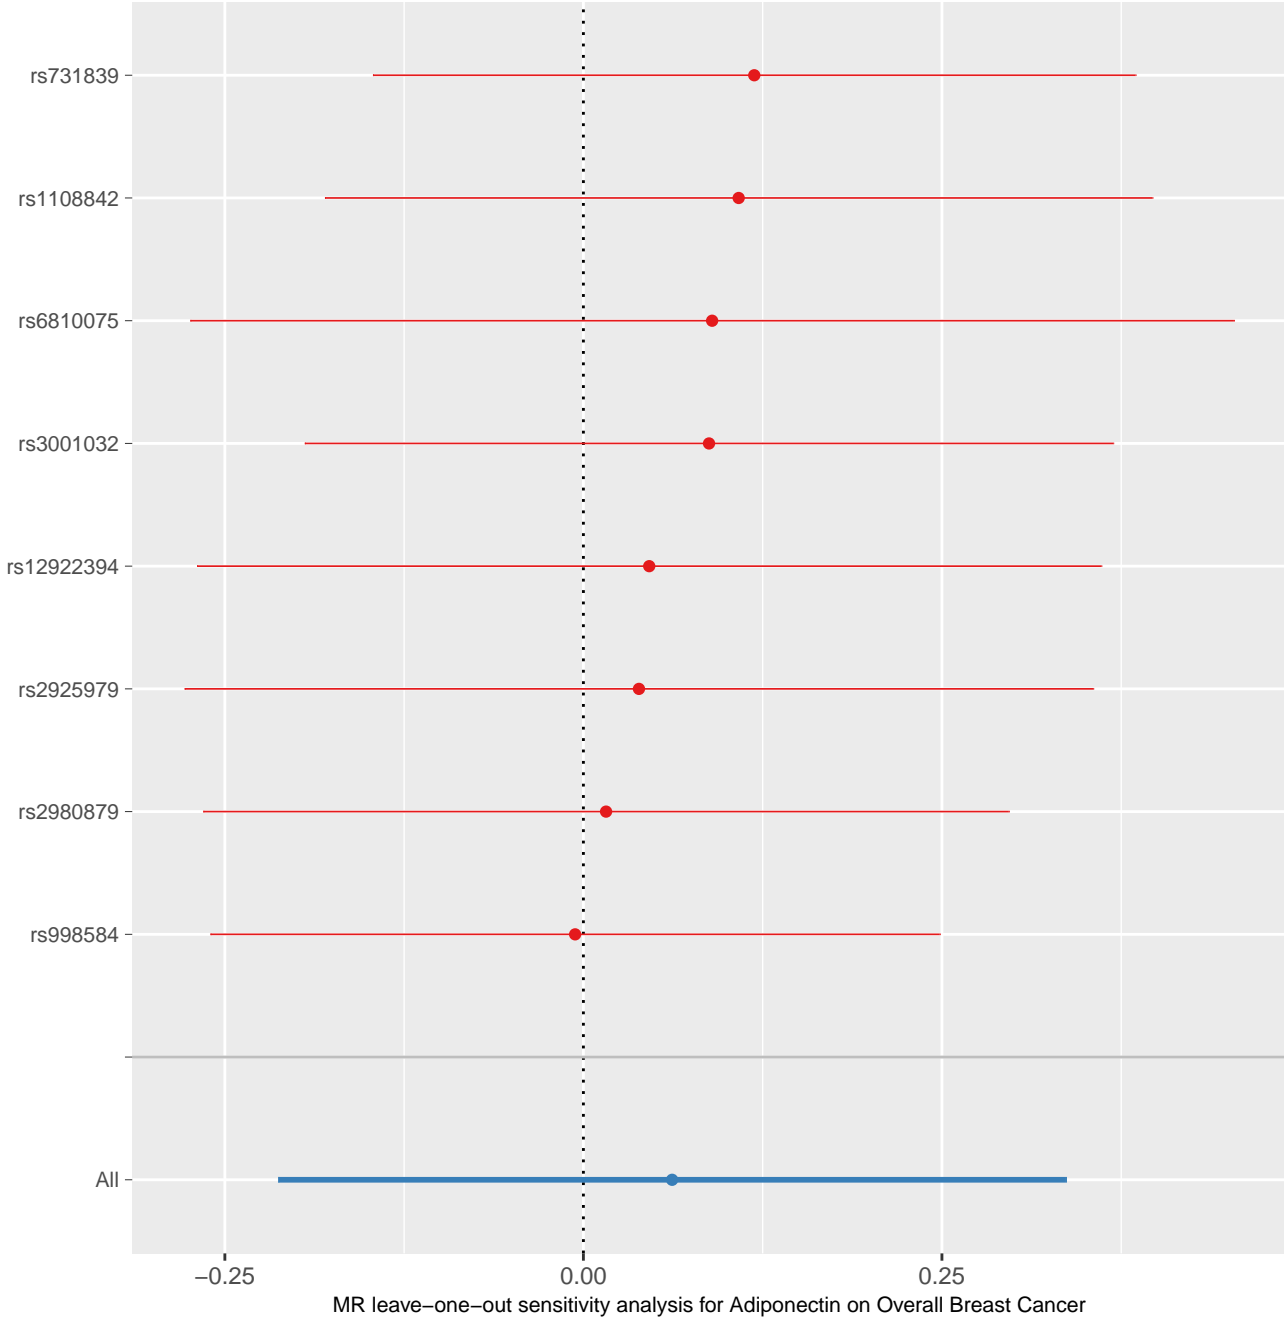

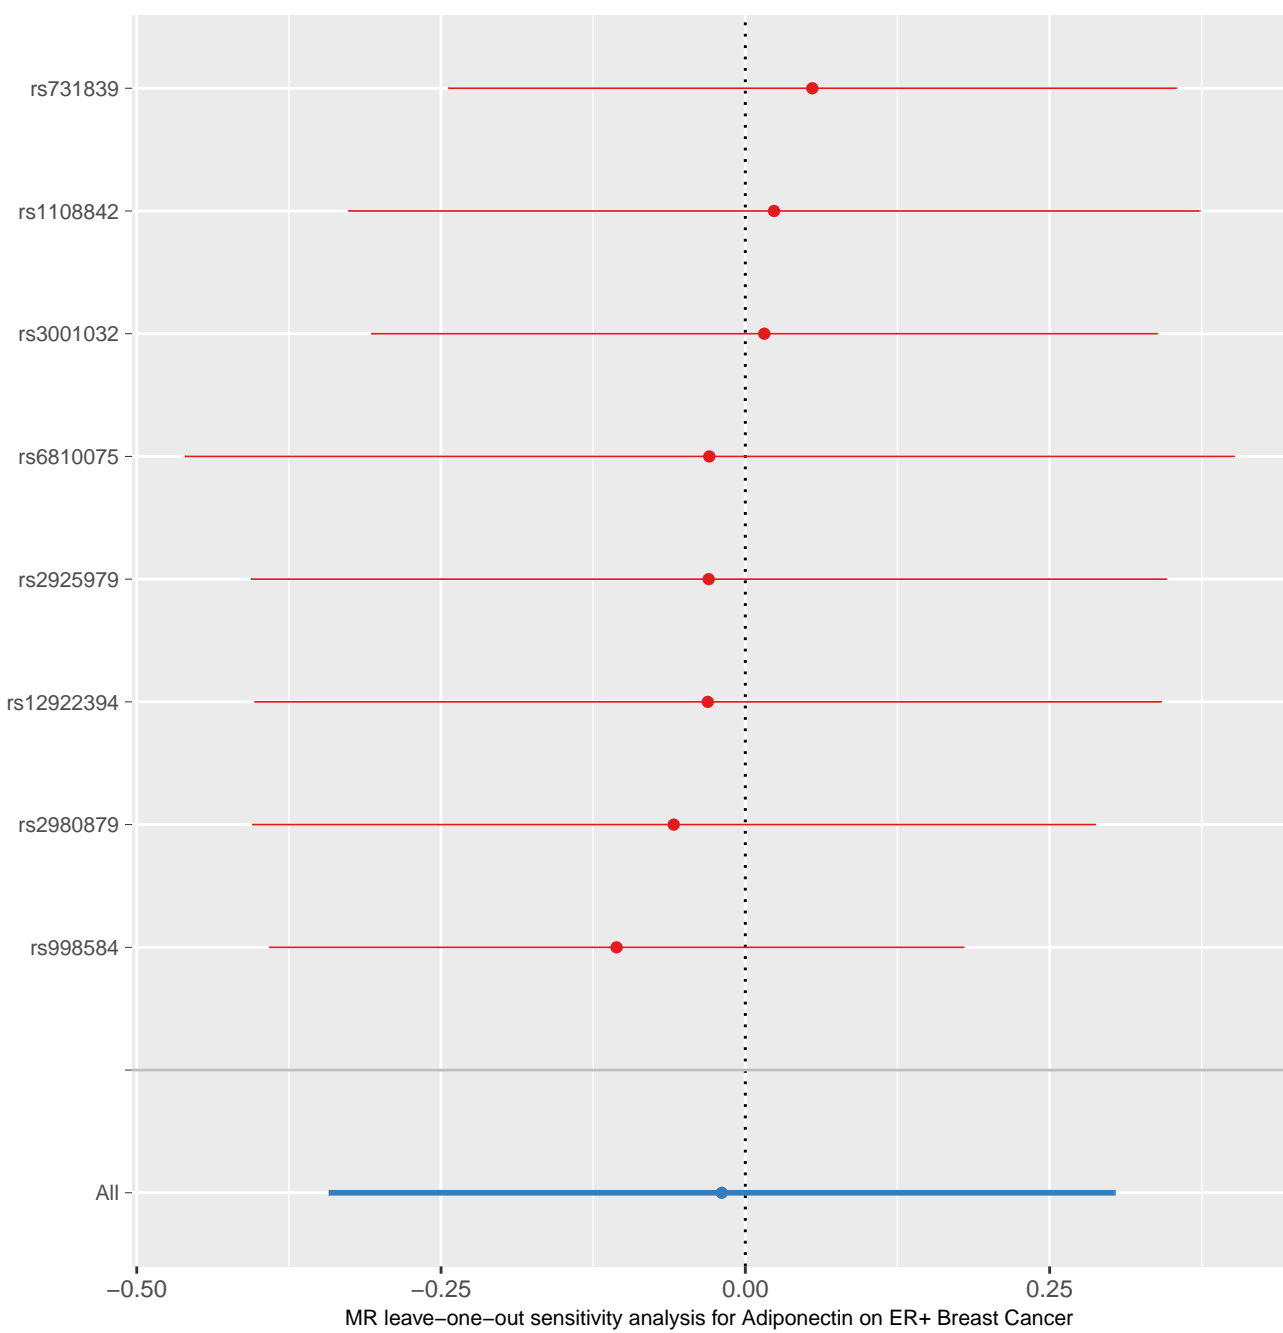

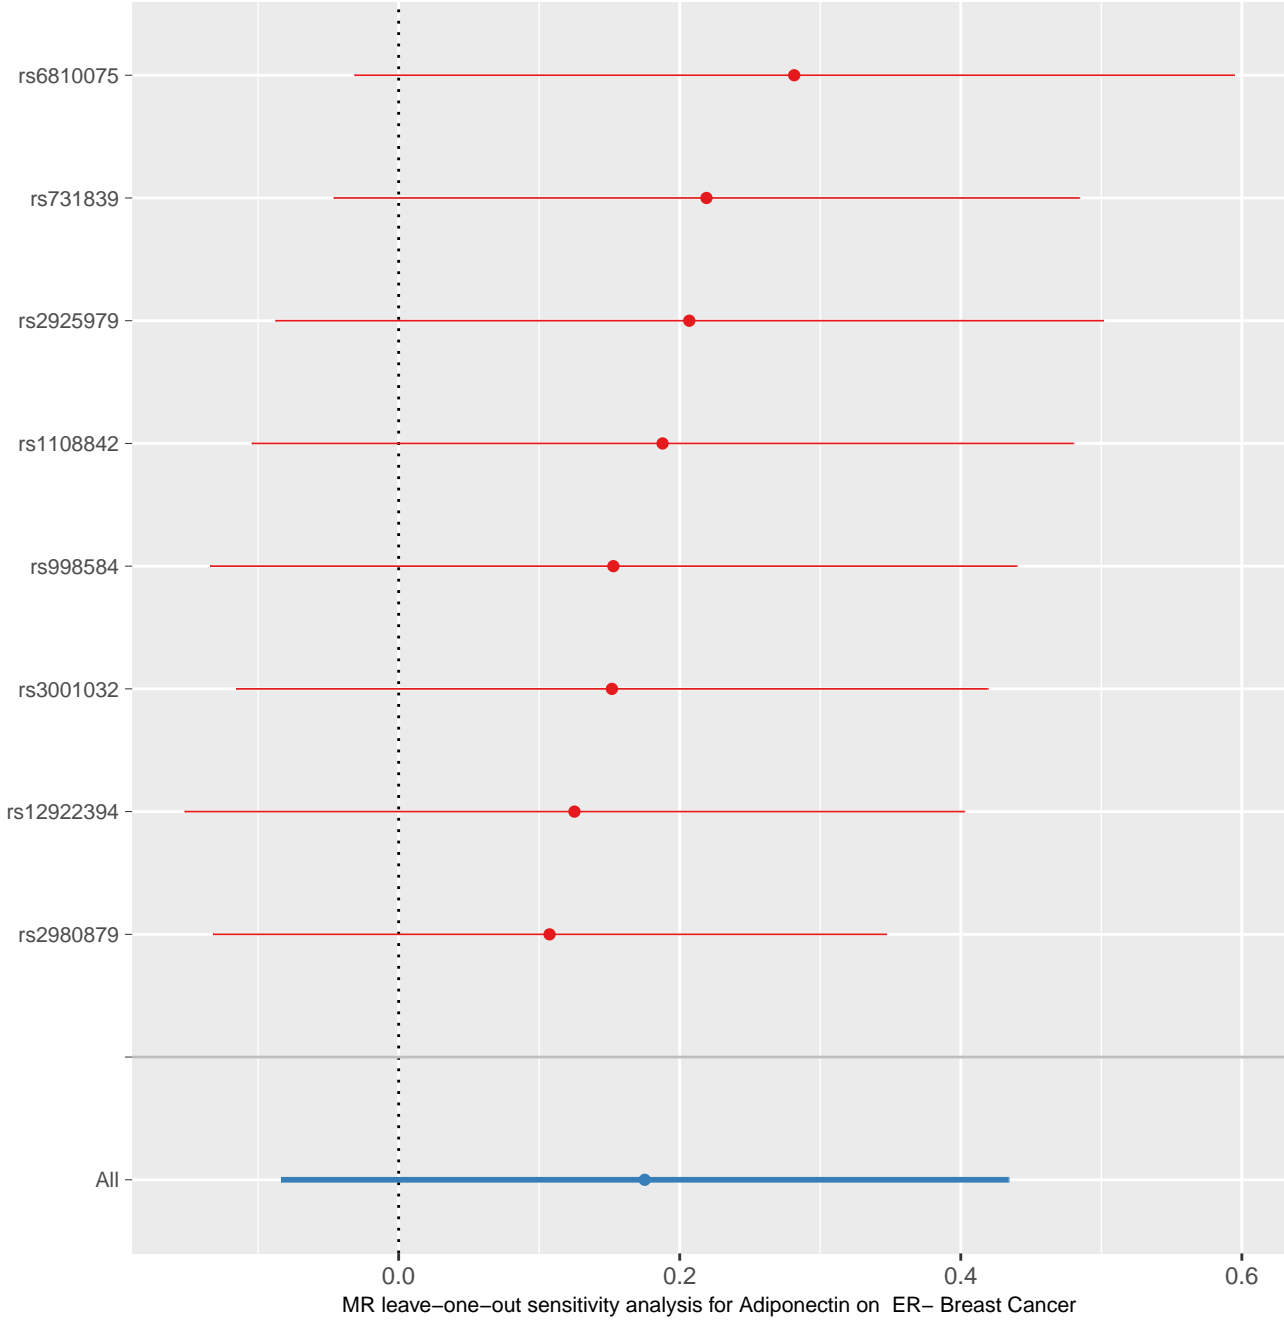



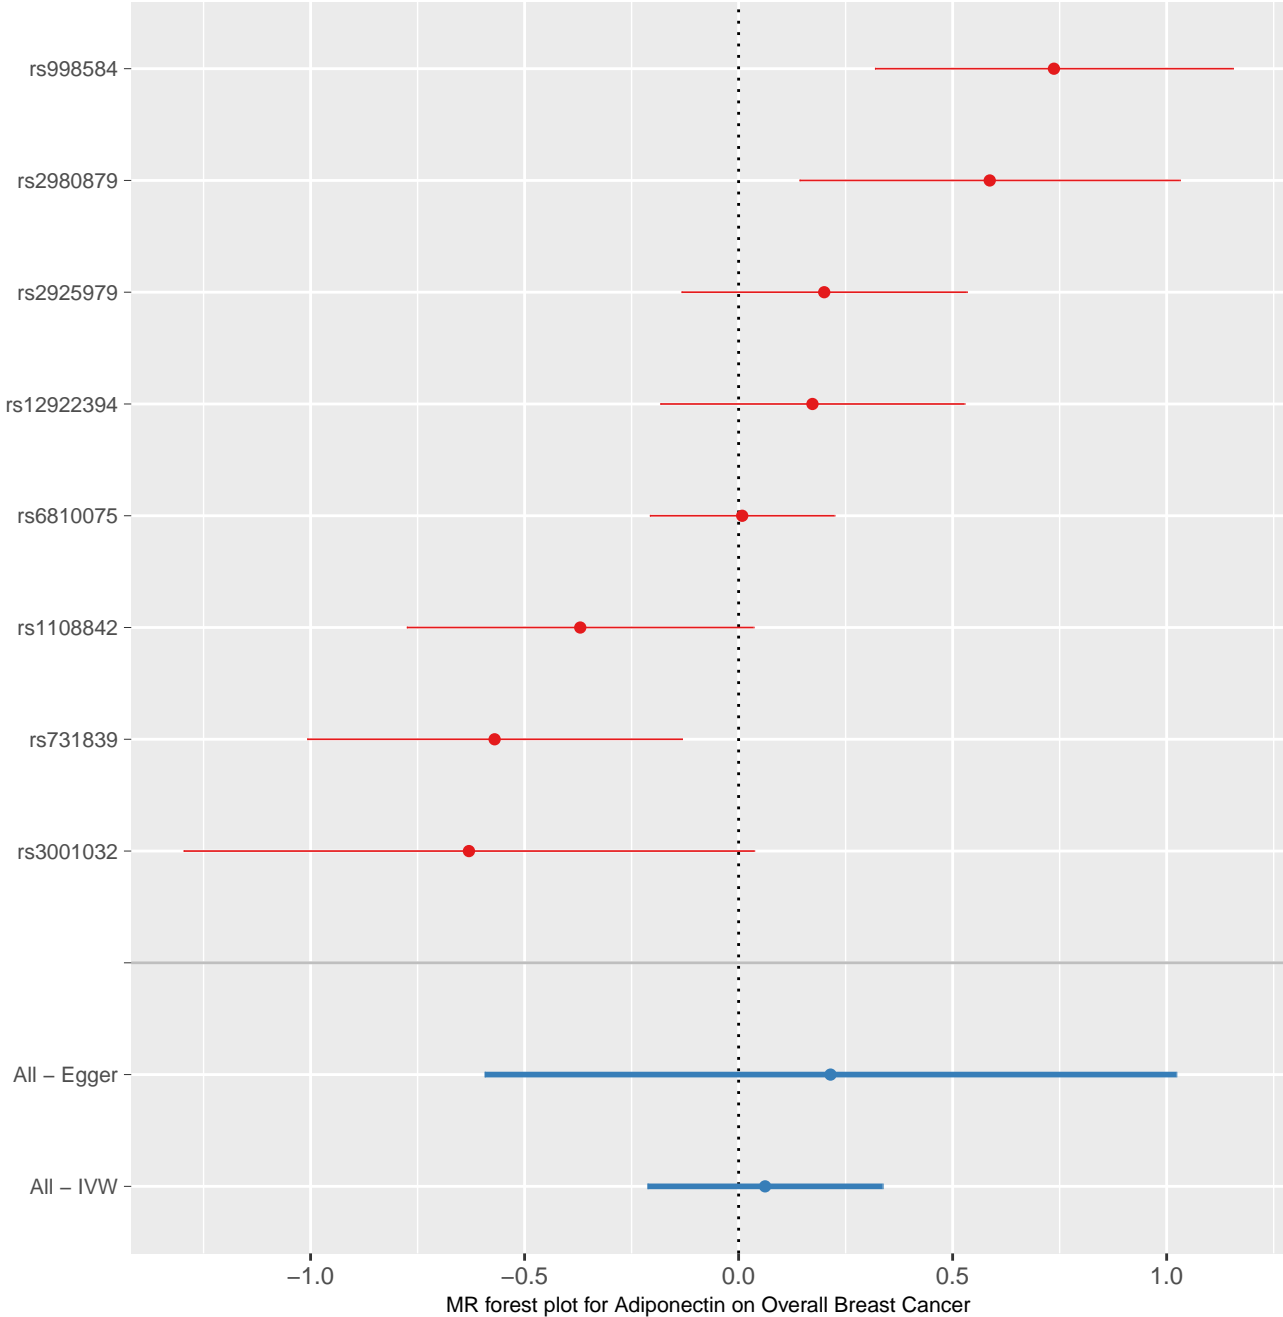

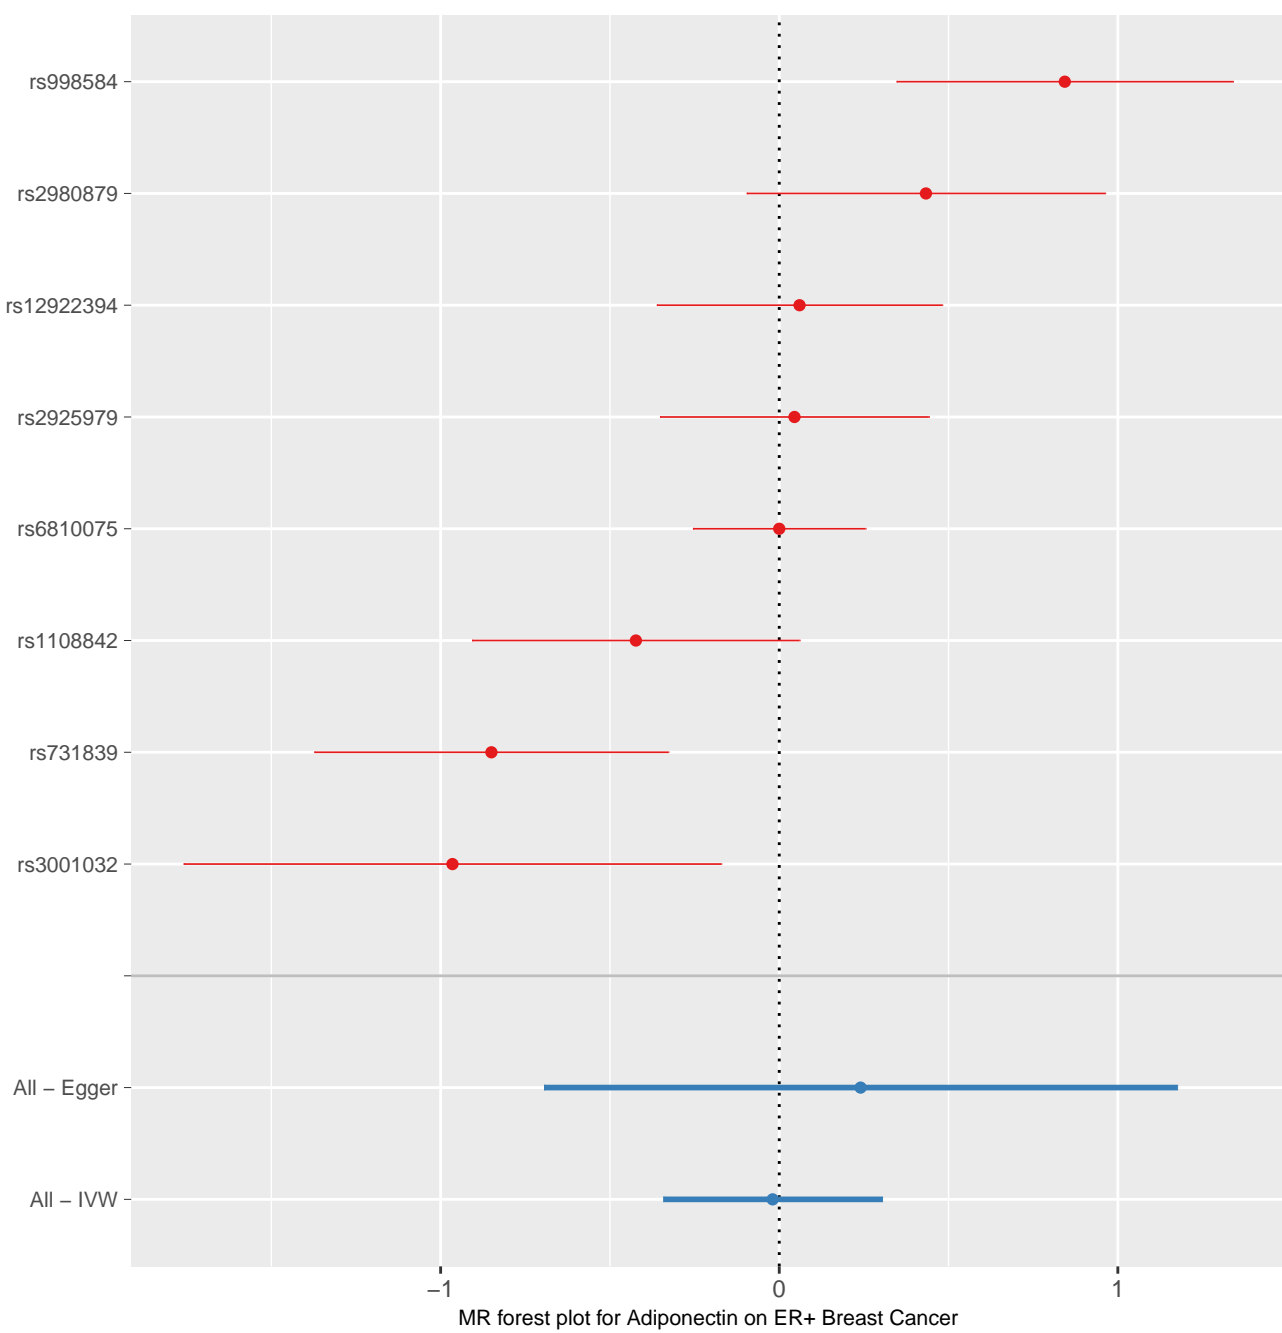

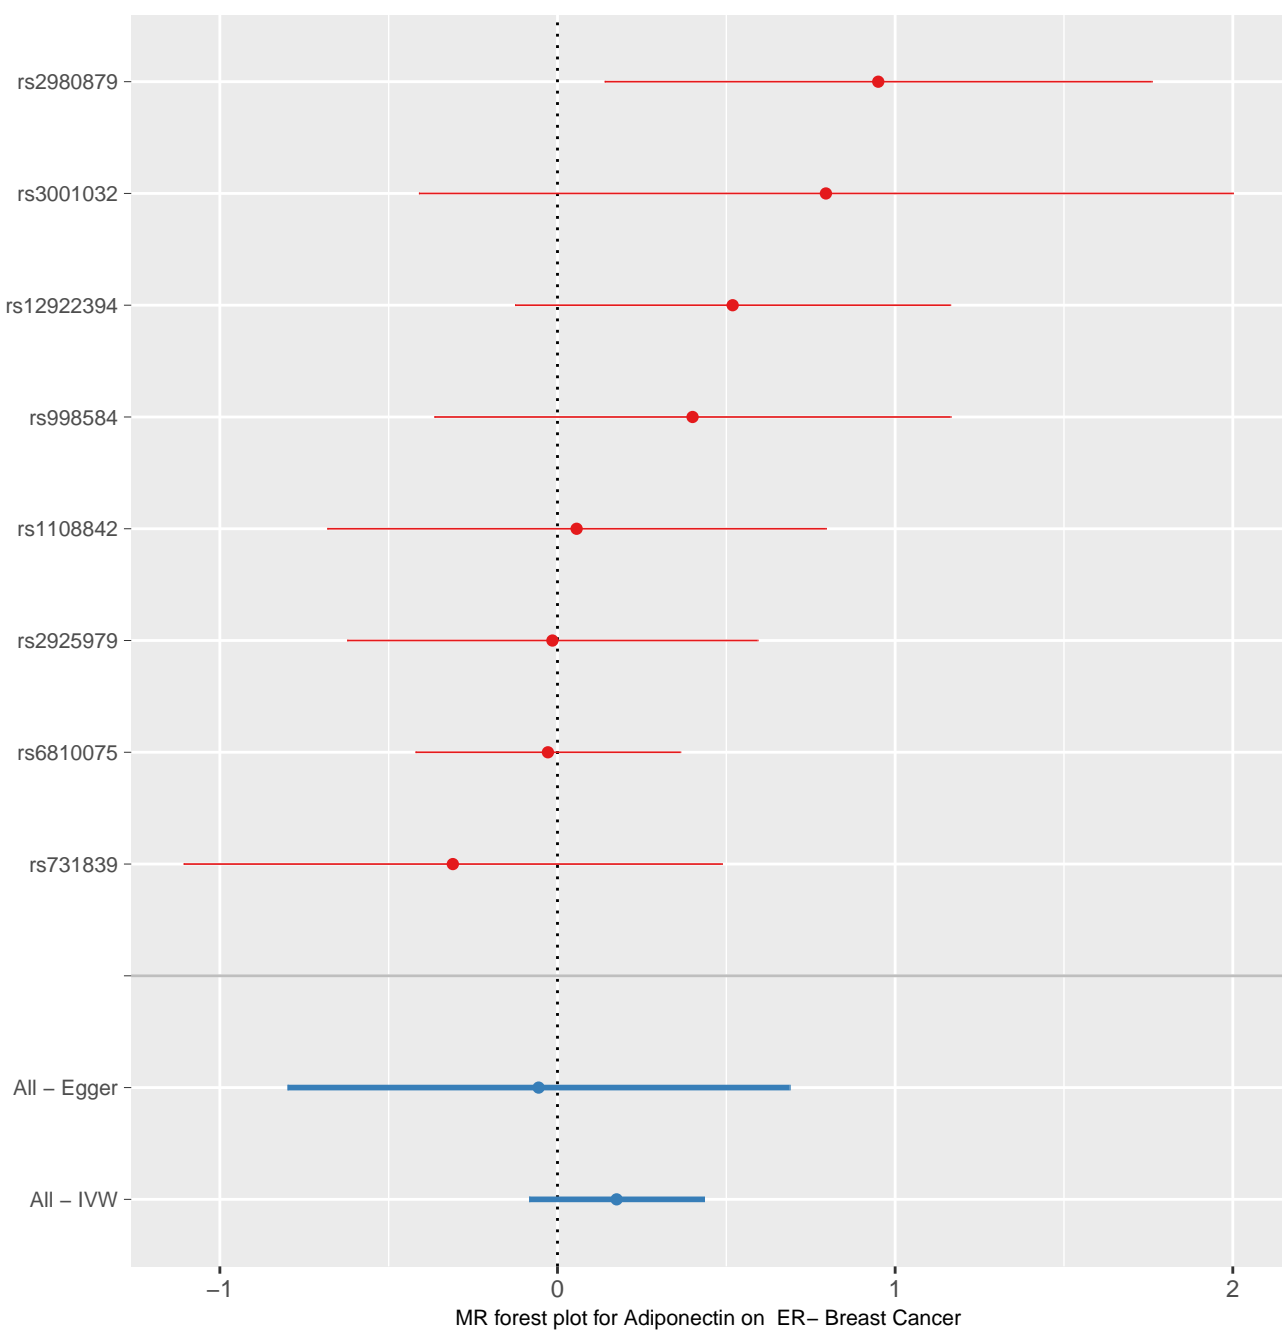

### MR Method

- Inverse variance weighted
- MR Egger

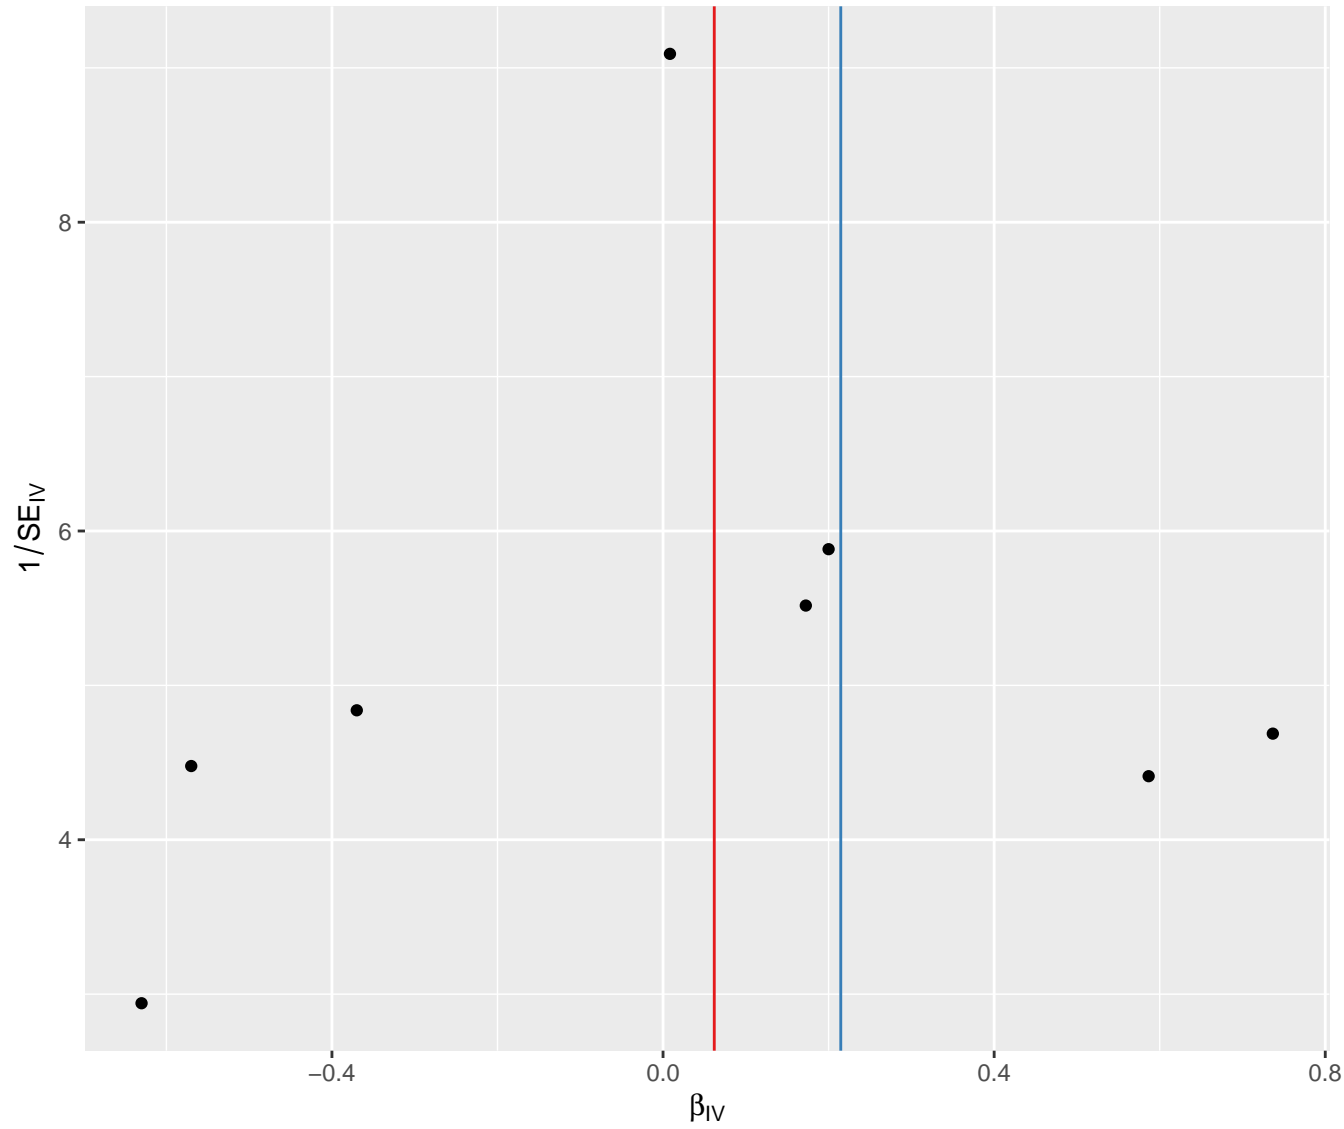

### MR Method

- Inverse variance weighted
- MR Egger

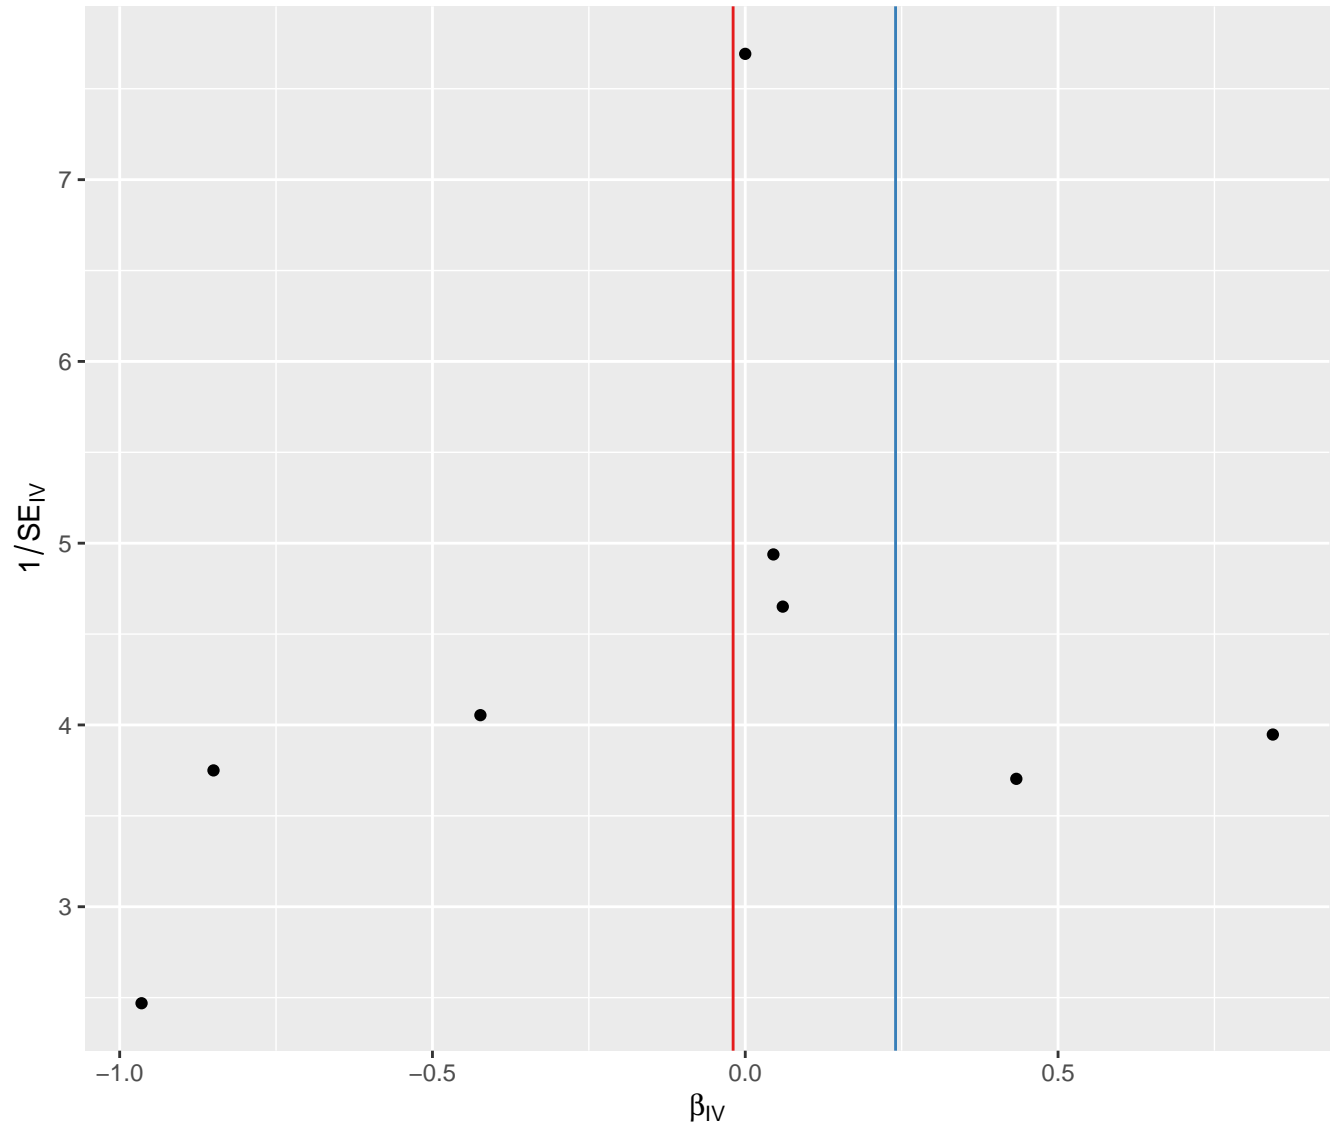

### MR Method

- Inverse variance weighted
- MR Egger

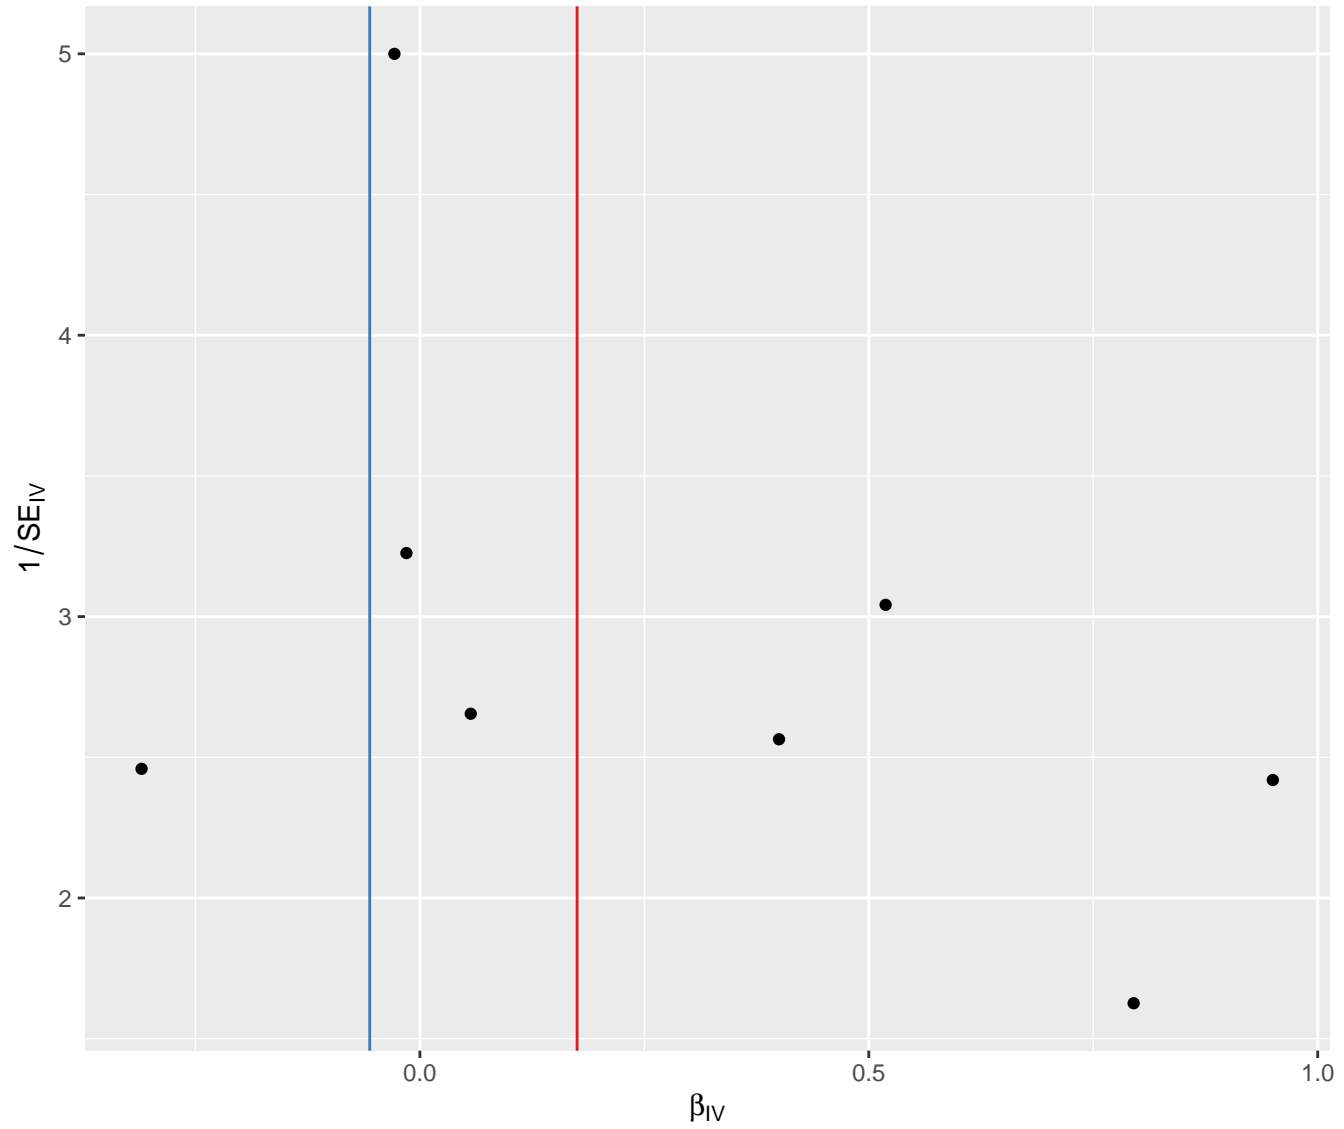

MR Test

- Inverse variance weighted
- MR Egger
- Weighted median

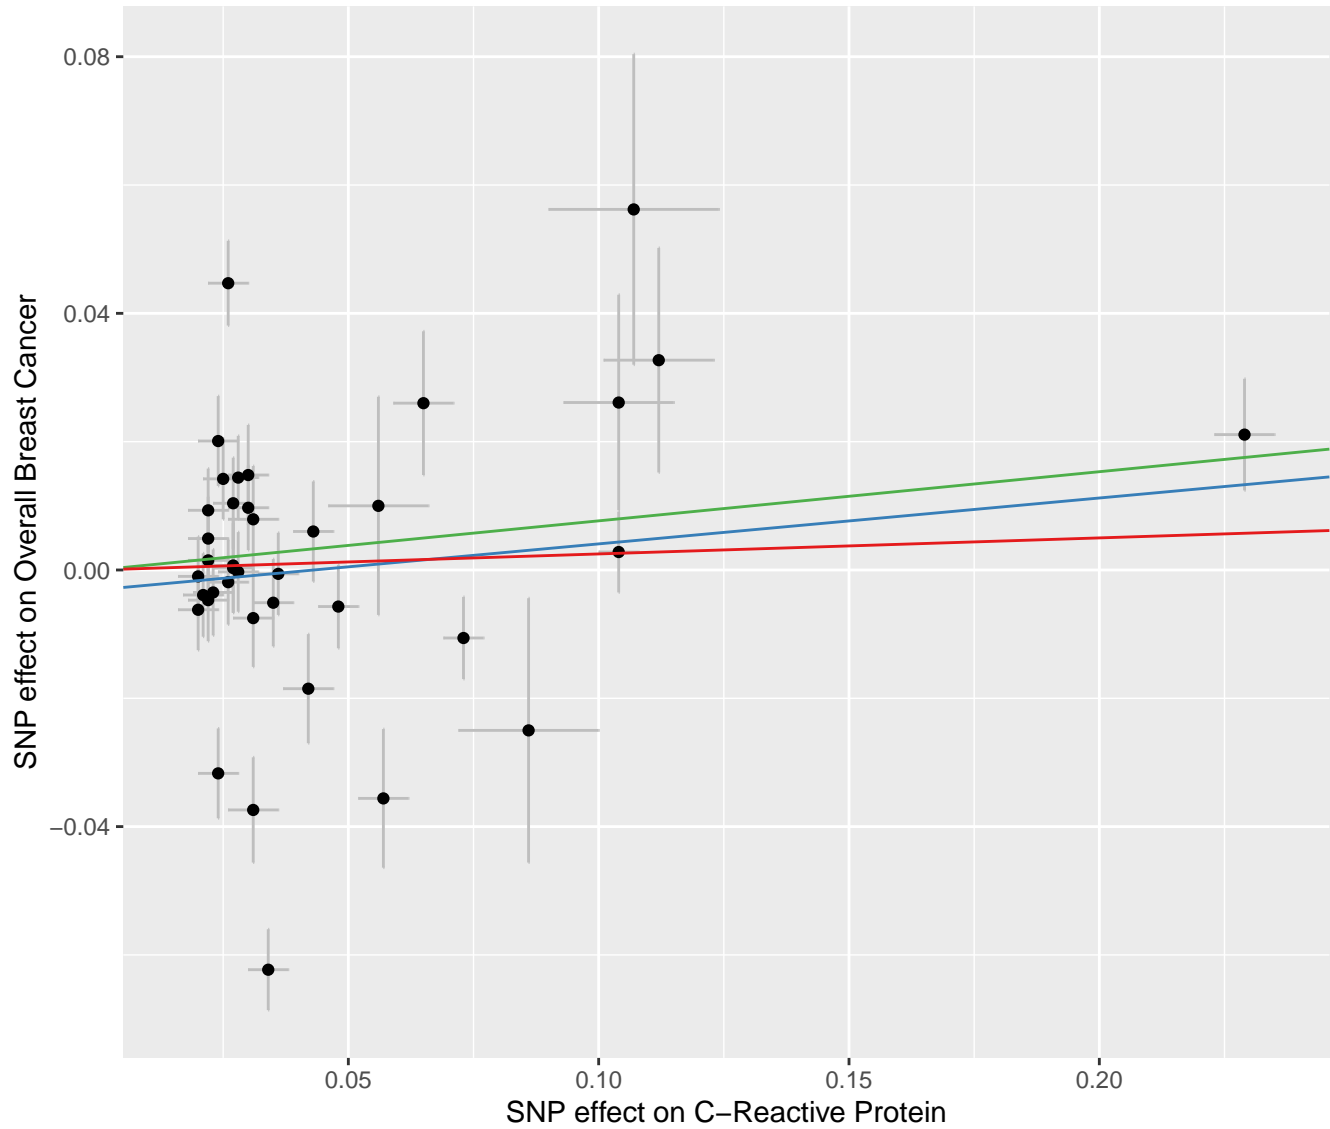

MR Test

- Inverse variance weighted
- MR Egger
- Weighted median

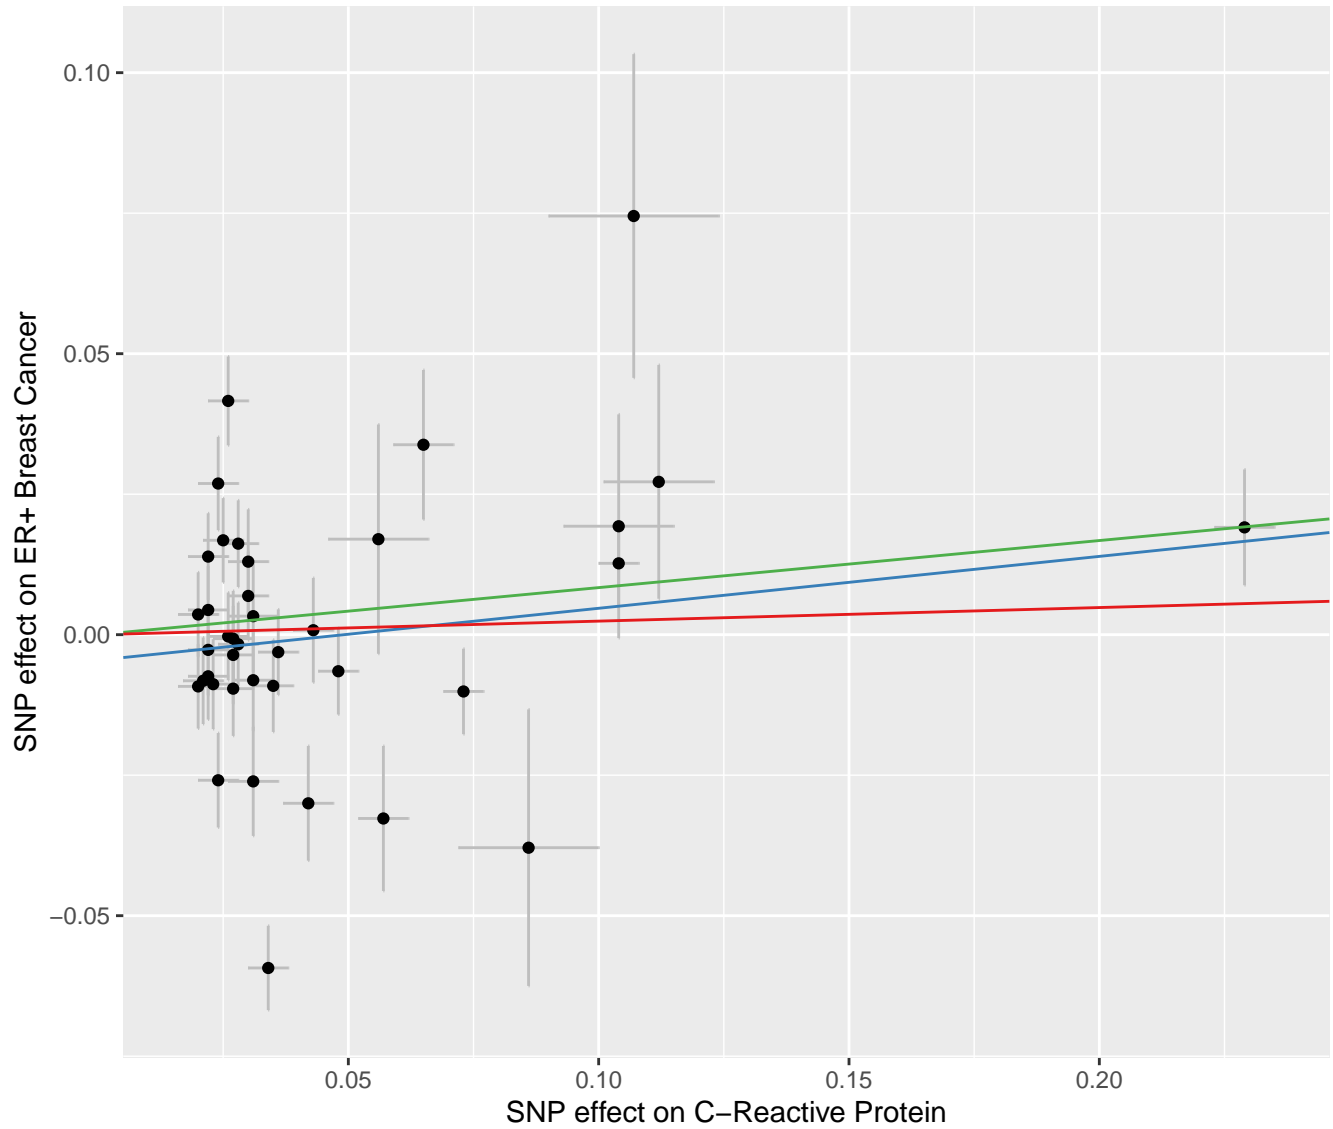



MR Test

- Inverse variance weighted
- MR Egger
- Weighted median

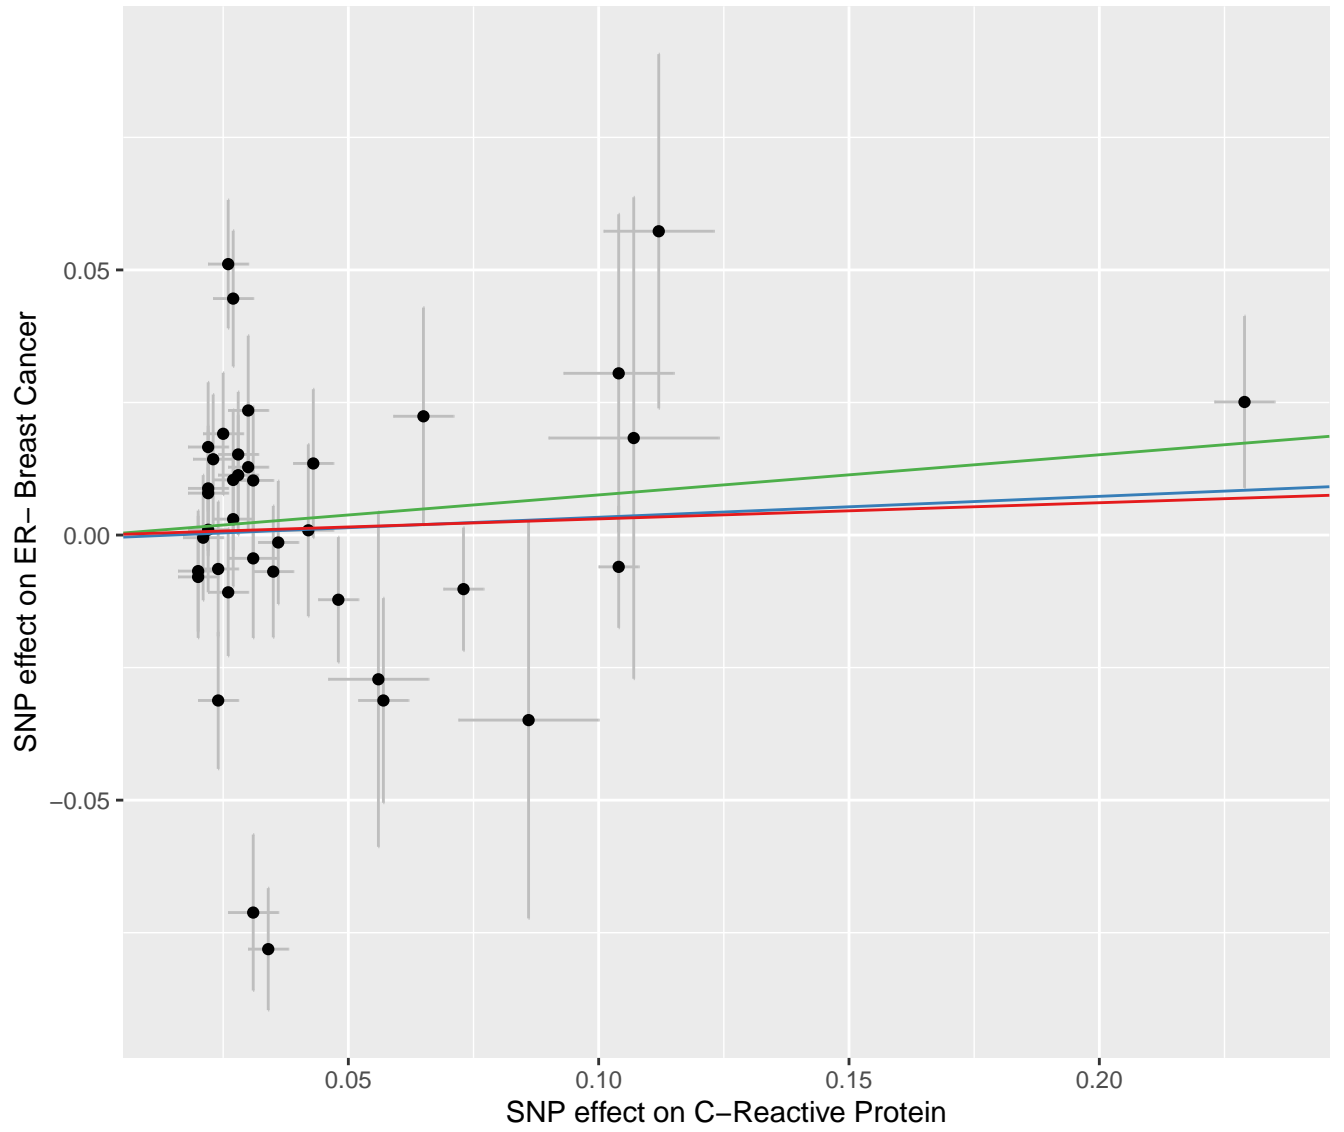

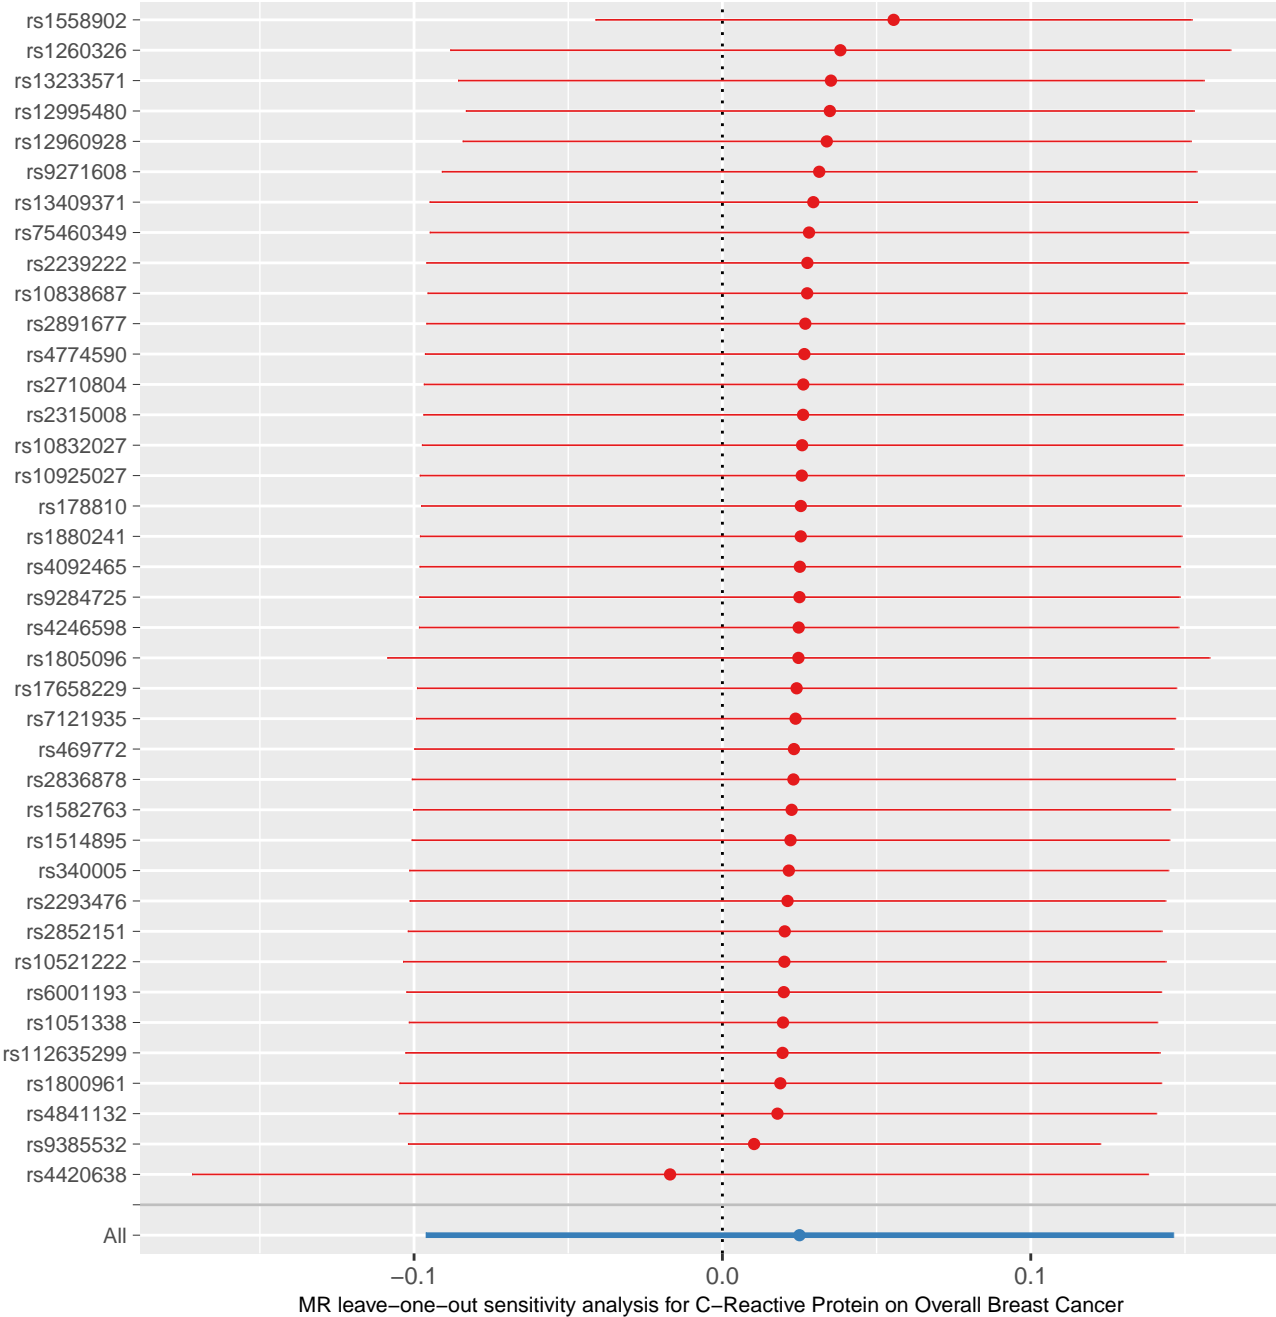

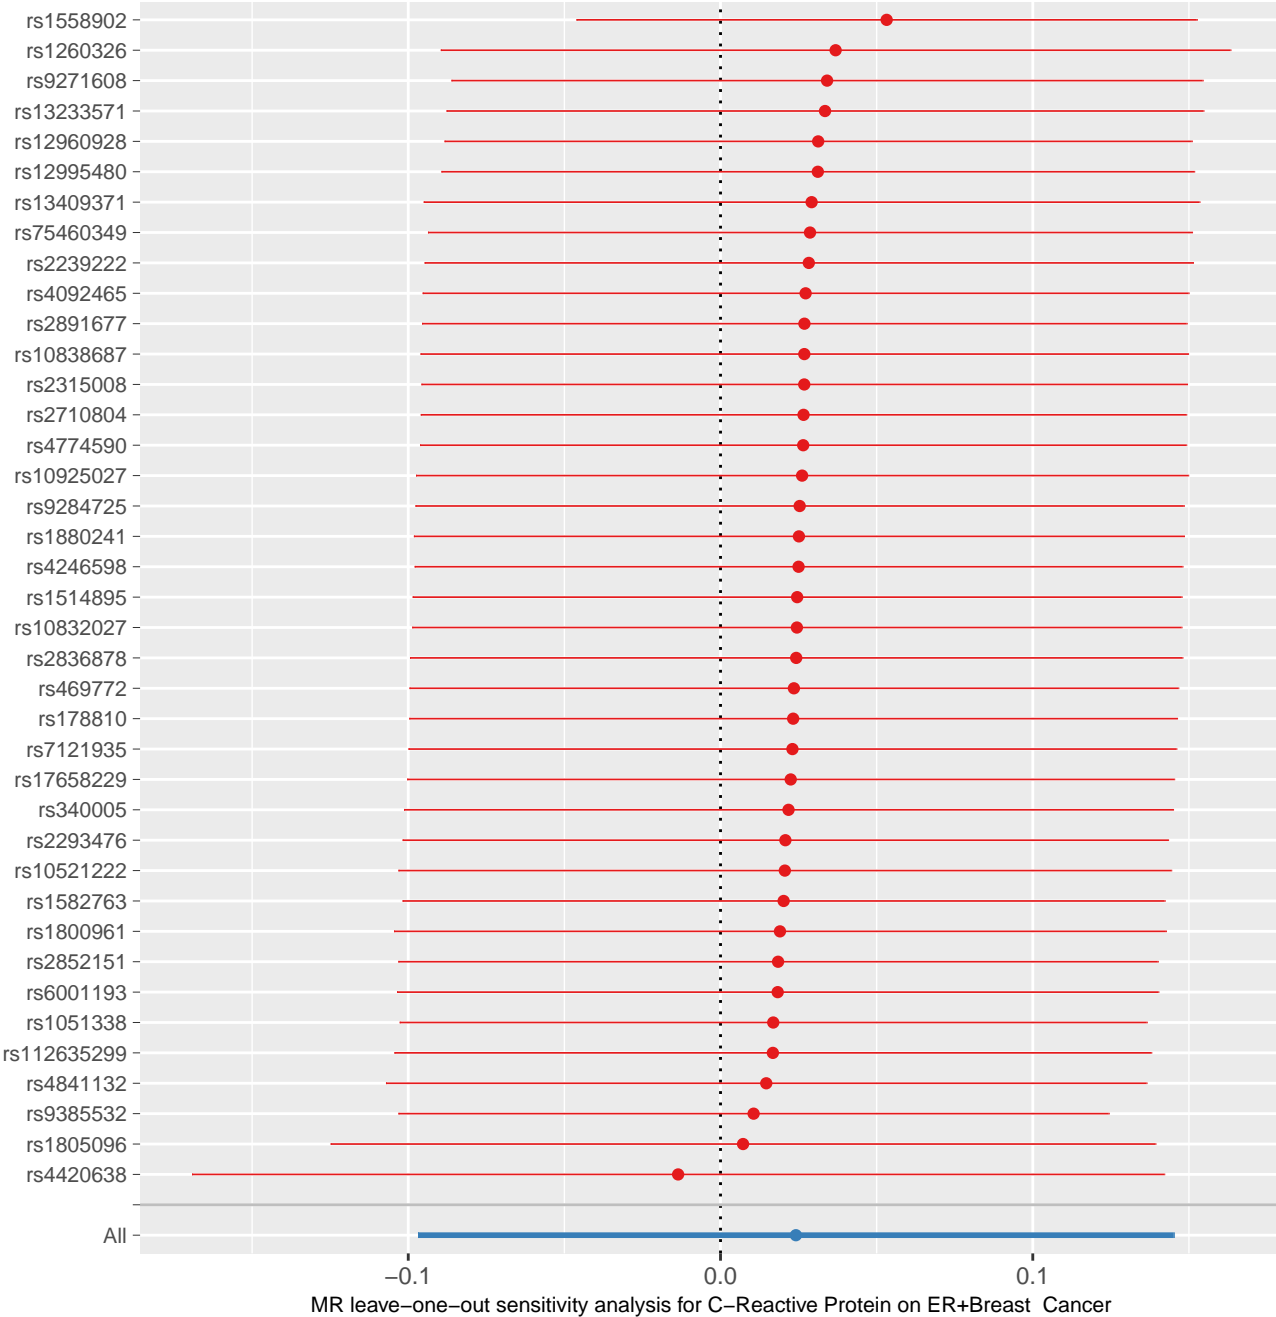

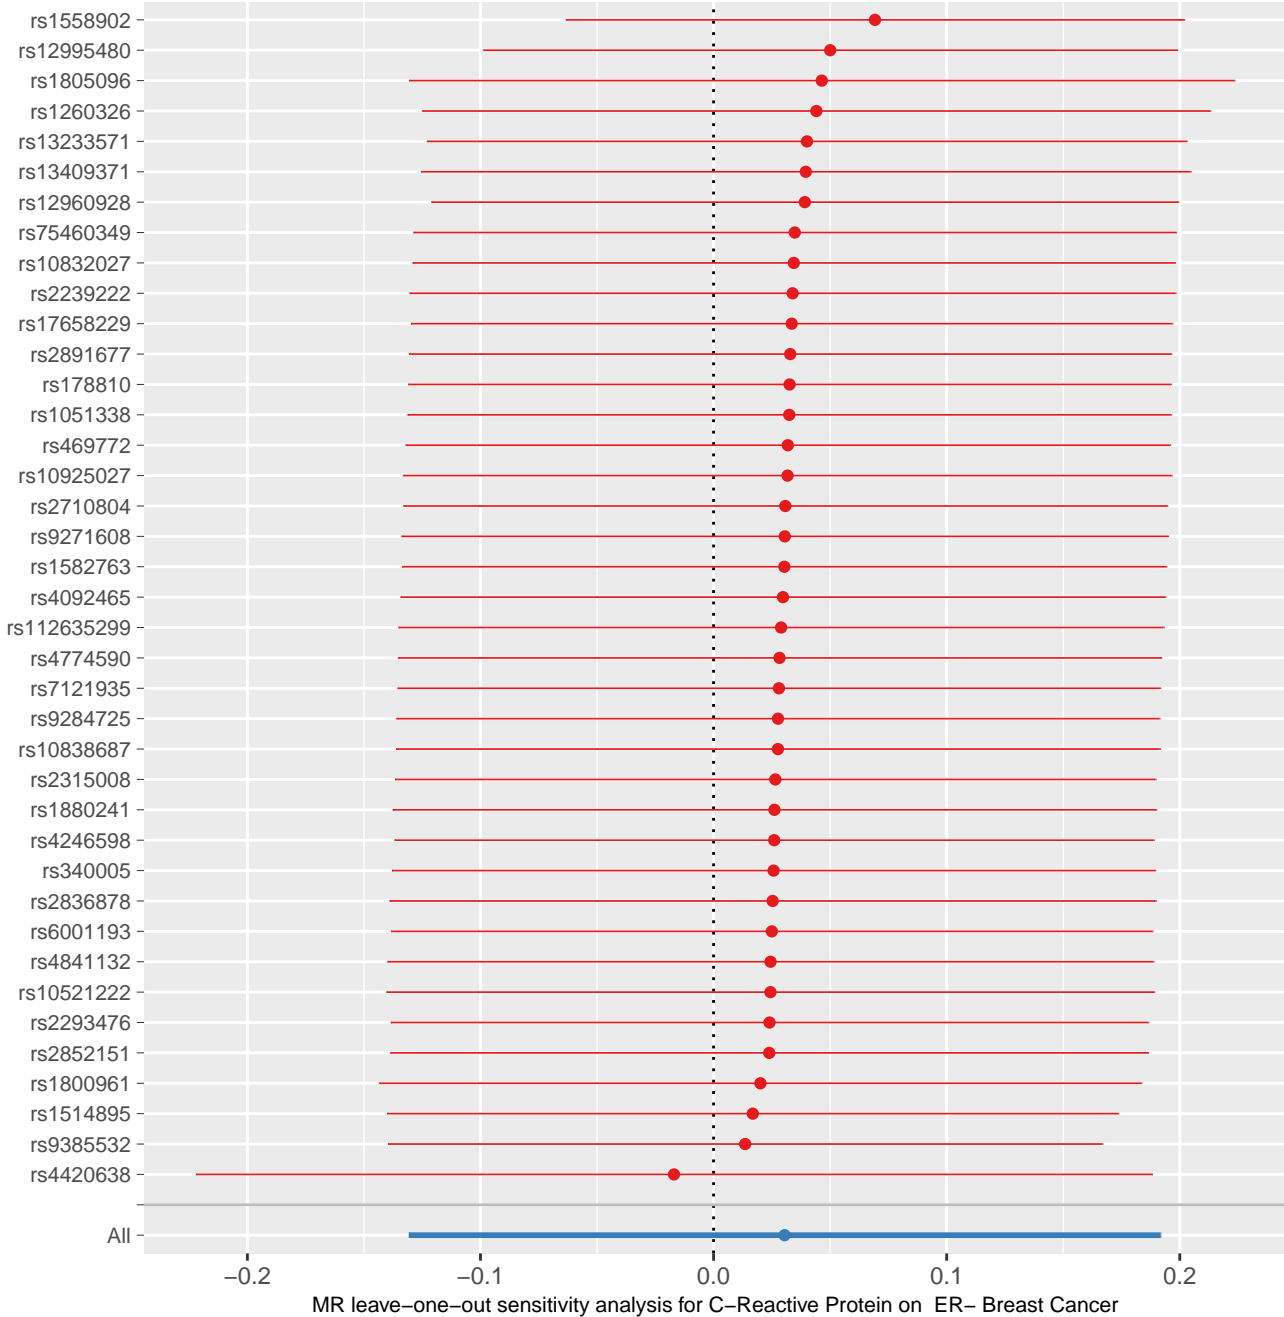

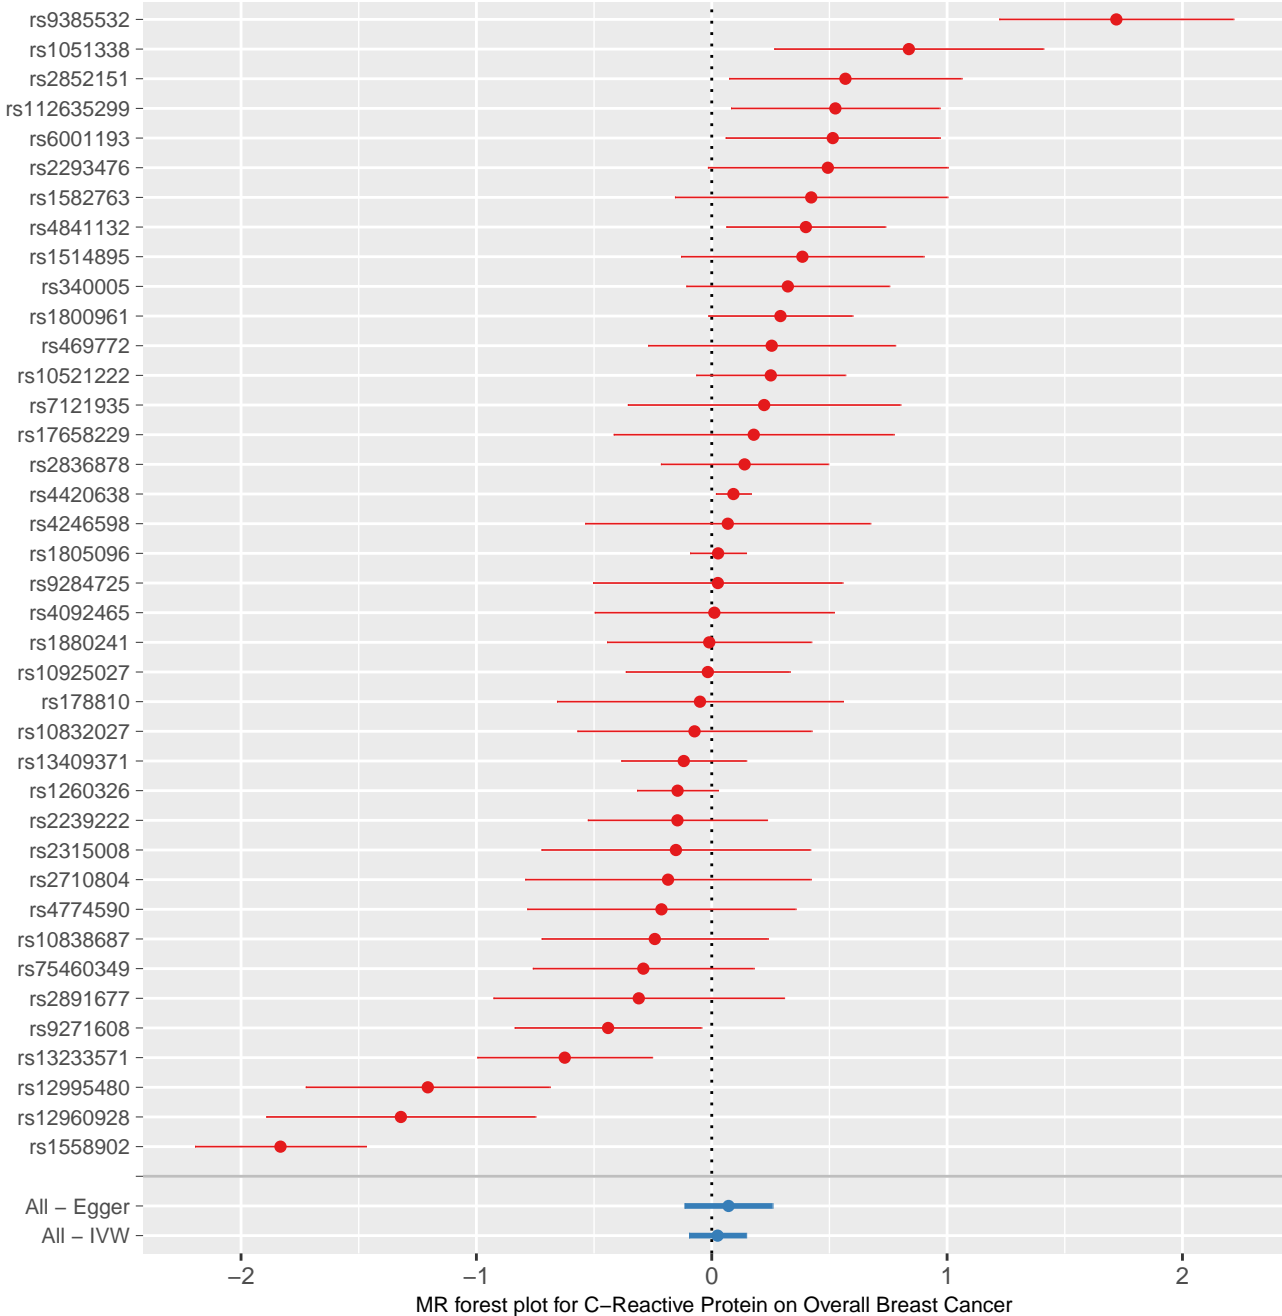

MR forest plot for C-Reactive Protein on Overall Breast Cancer

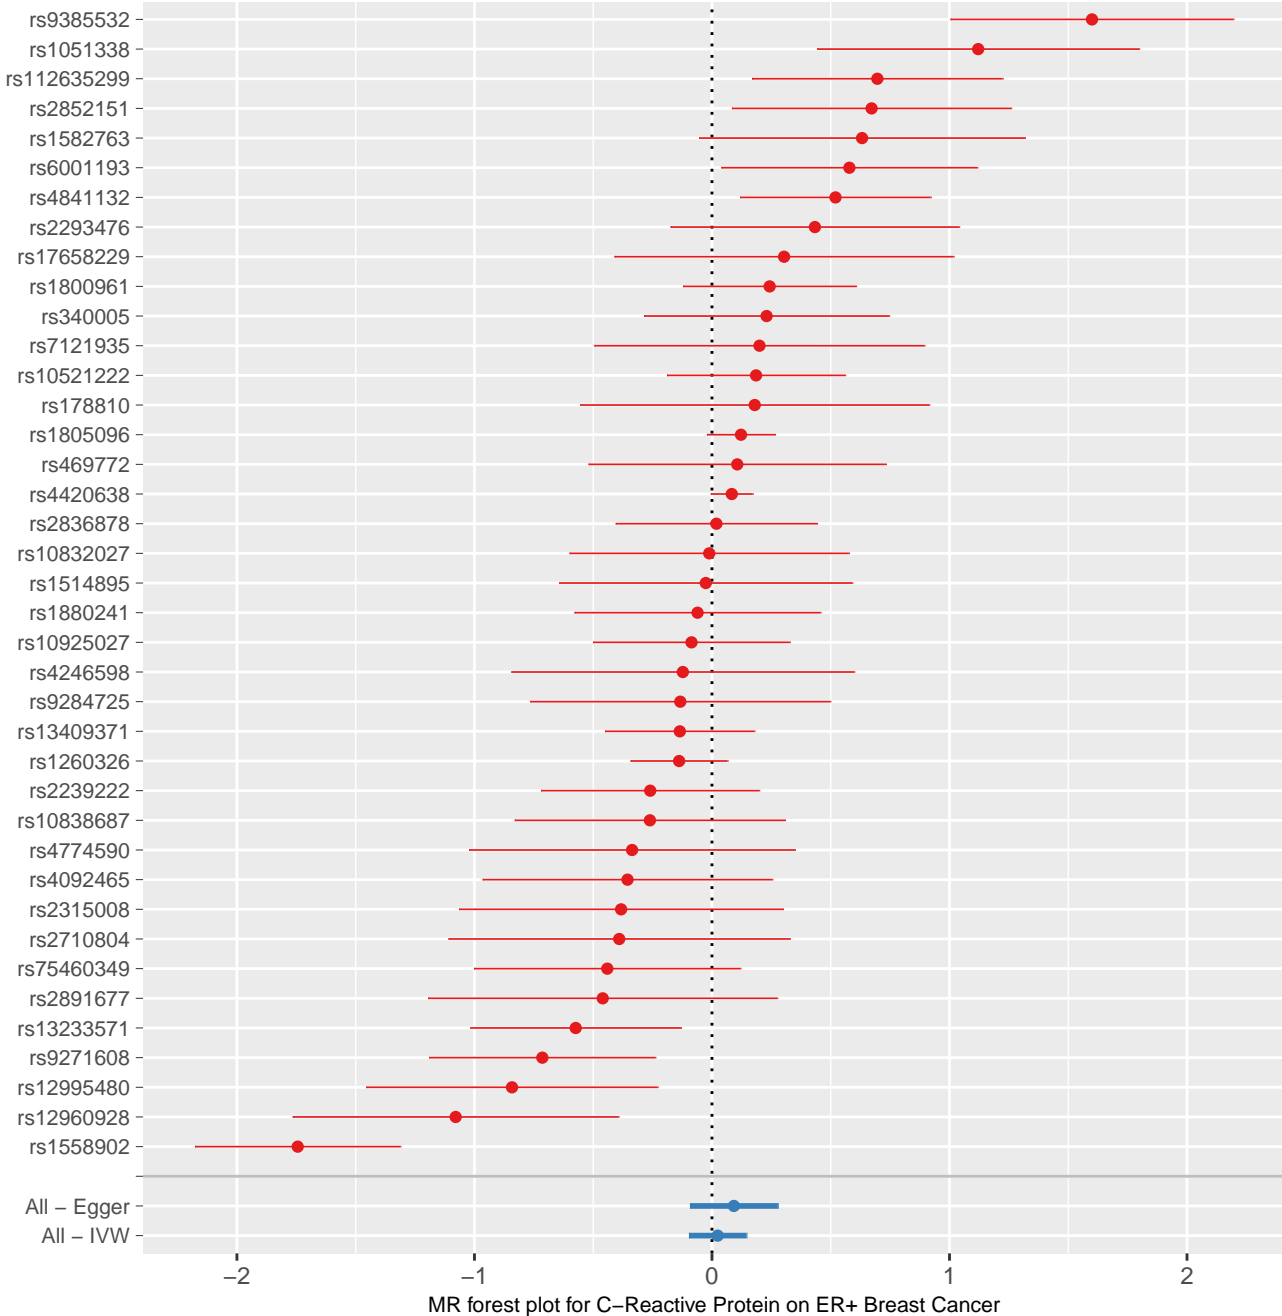

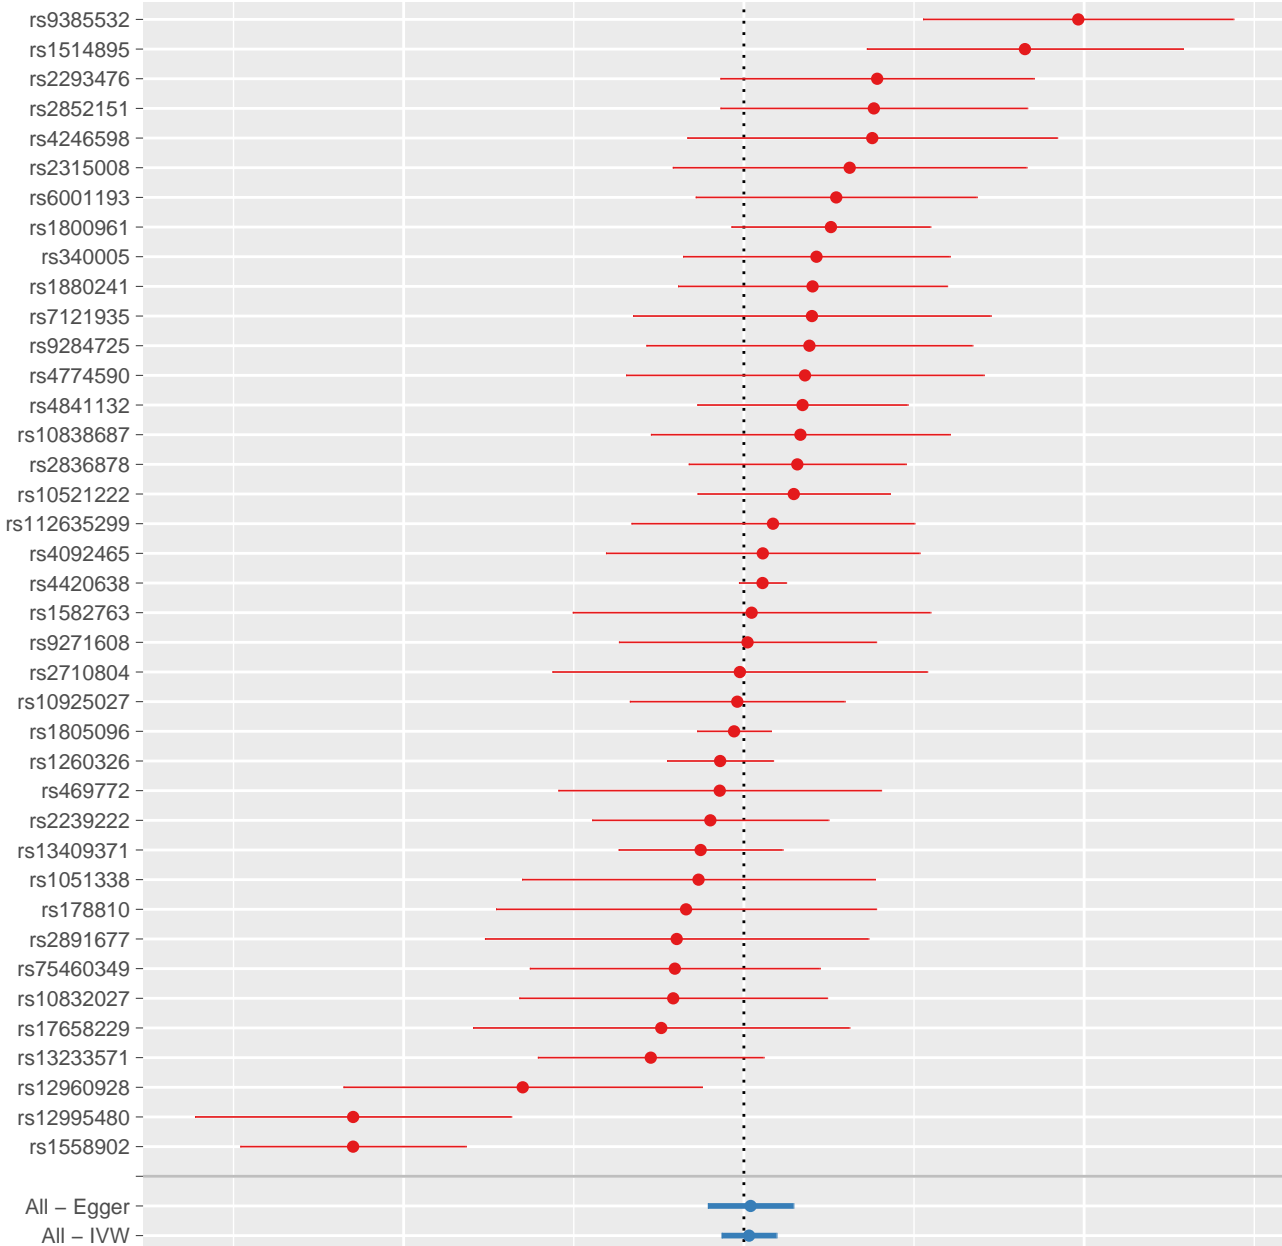

MR forest plot for C-Reactive Protein on ER+ Breast Cancer

### MR Method

- Inverse variance weighted
- MR Egger

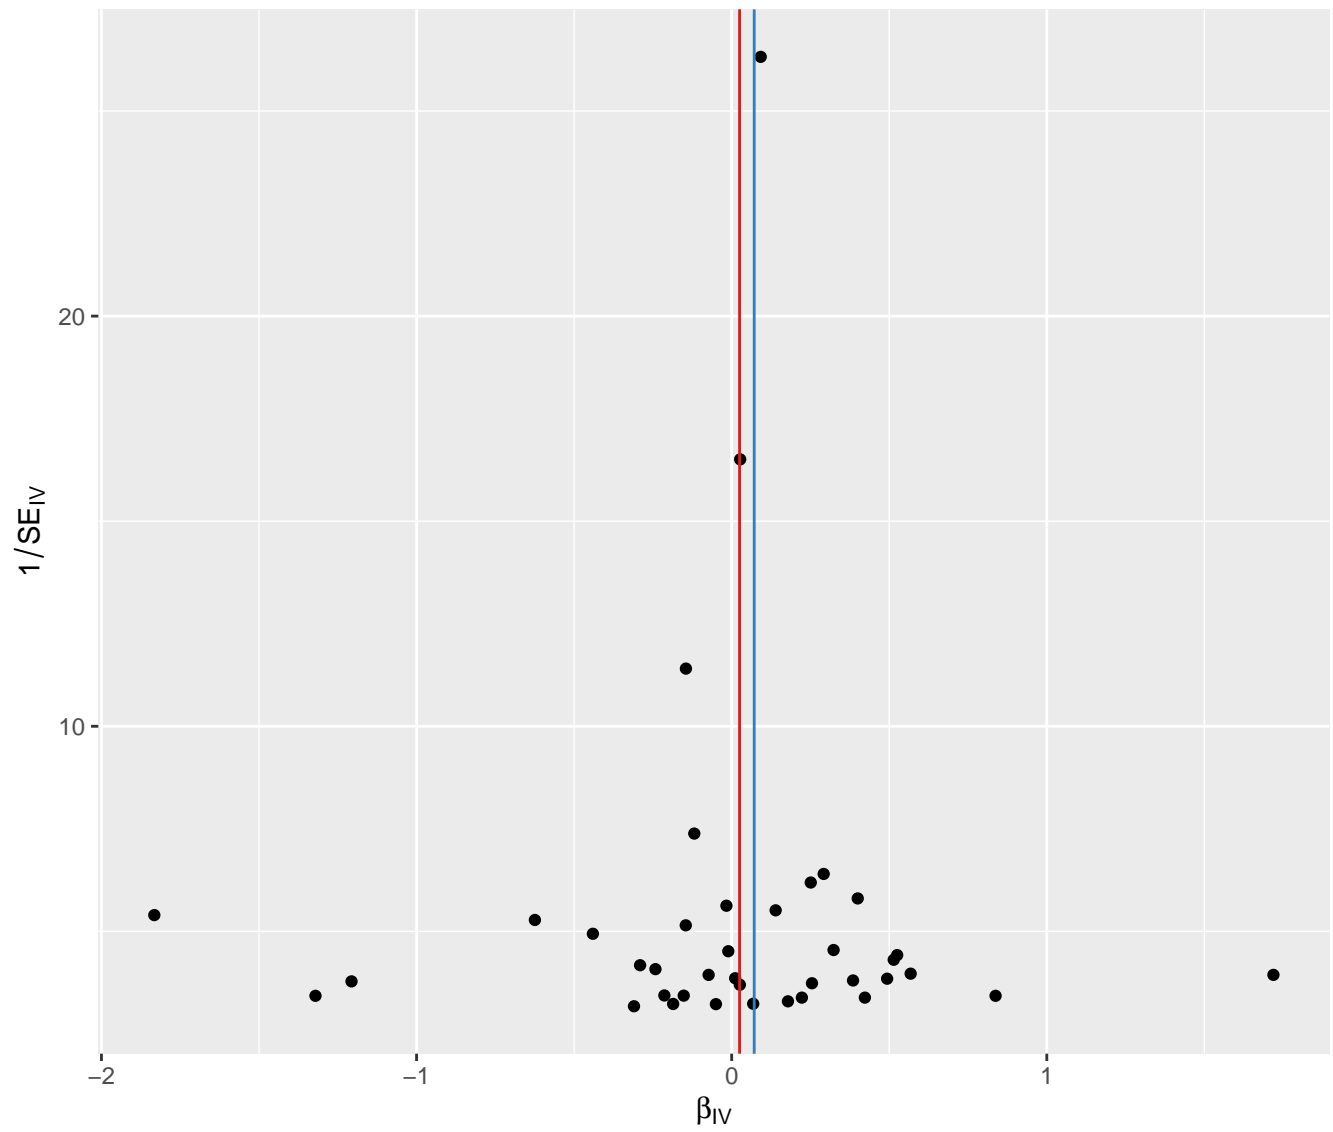



### MR Method

- Inverse variance weighted
- MR Egger

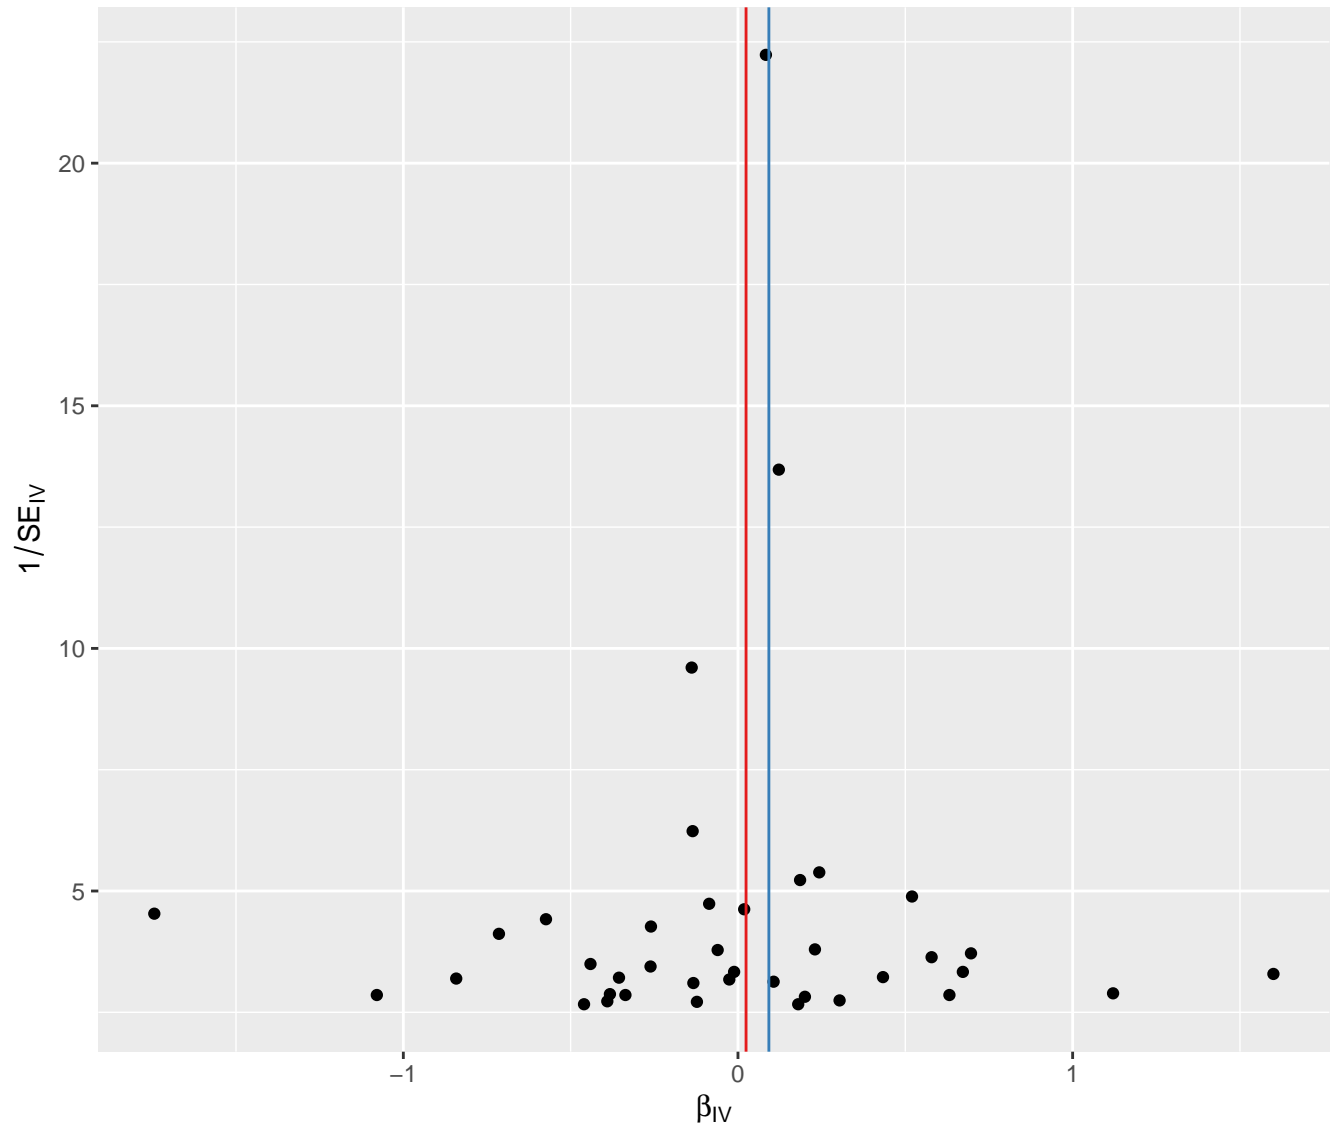

### MR Method

- Inverse variance weighted
- MR Egger

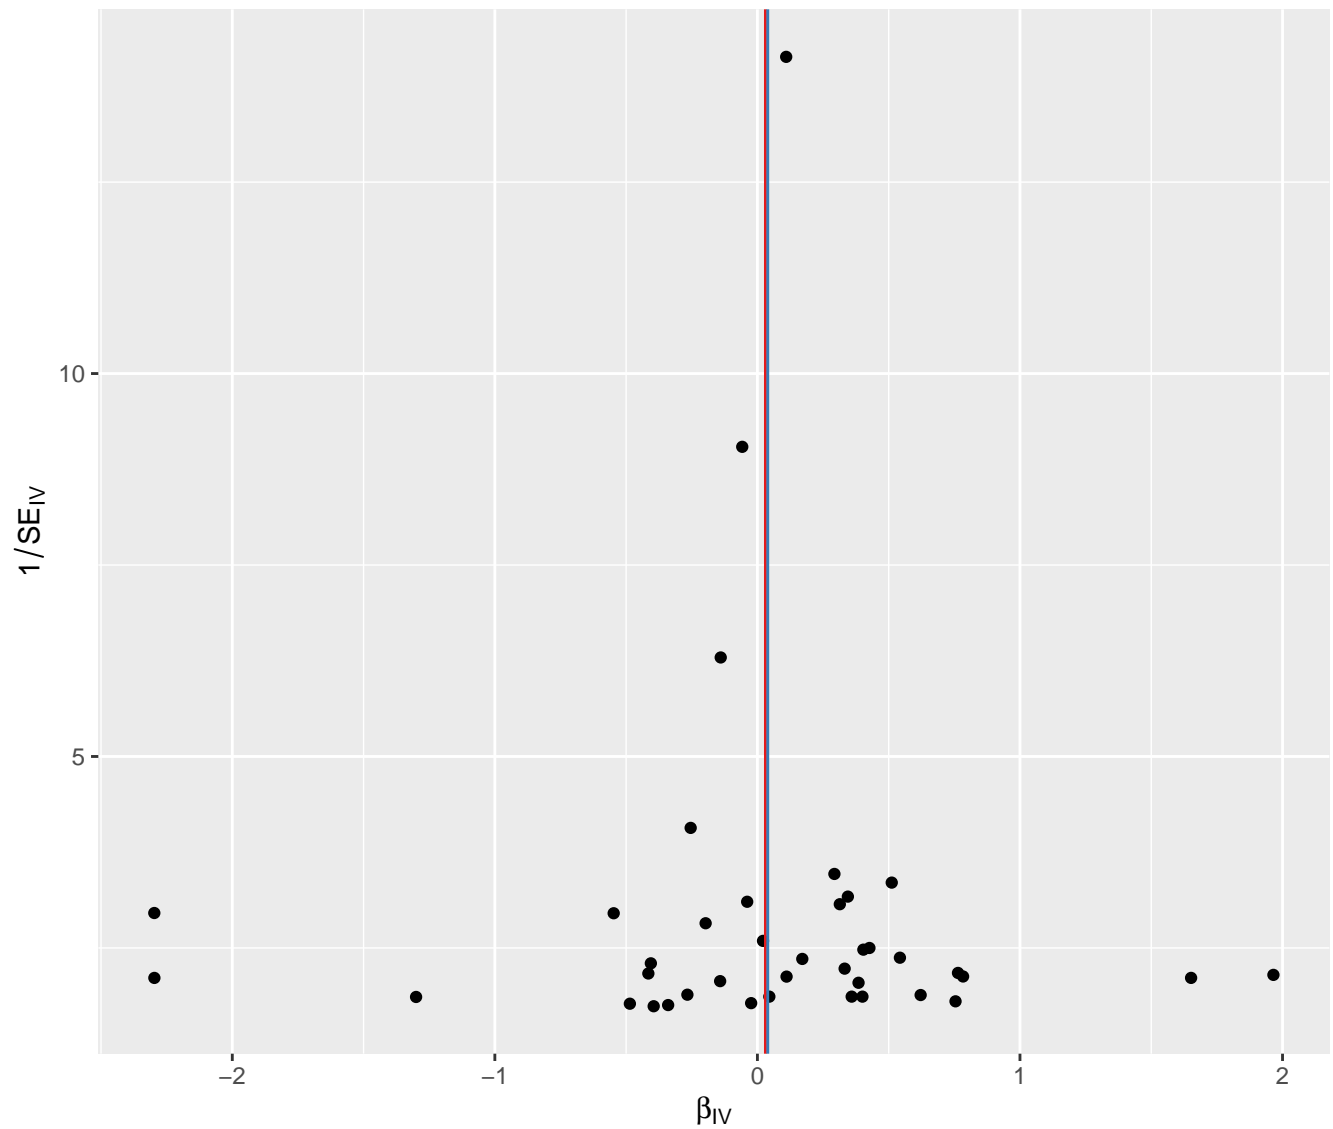

### MR Test

- Inverse variance weighted
- MR Egger
- Weighted median

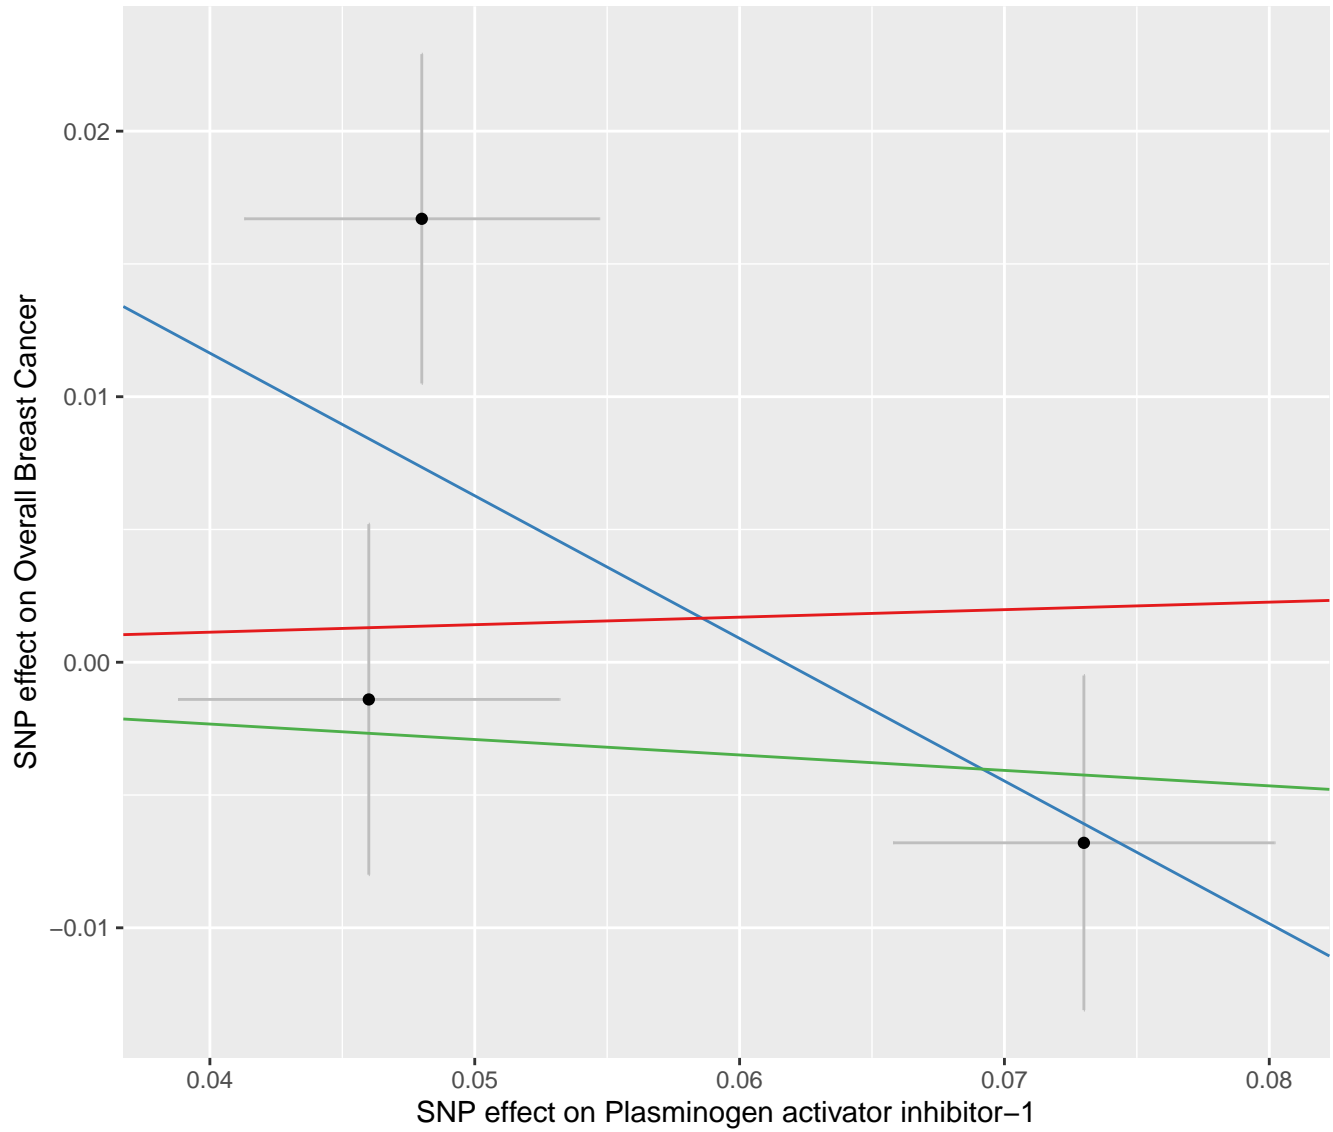

MR Test

- Inverse variance weighted
- MR Egger
- Weighted median

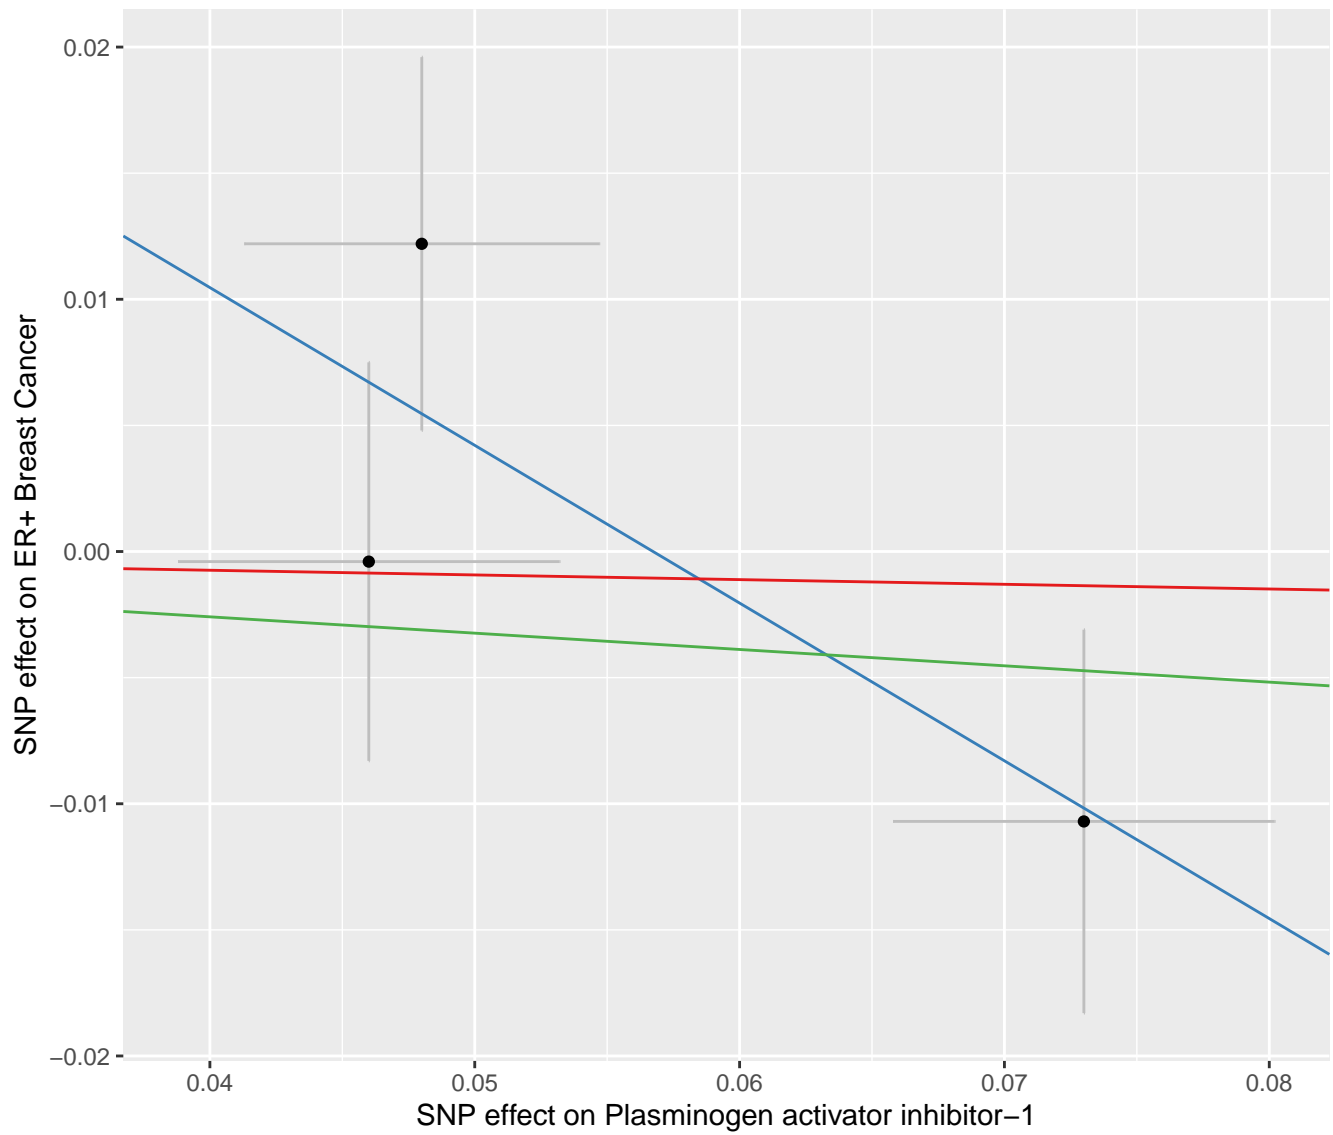

### MR Test

- Inverse variance weighted
- MR Egger
- Weighted median

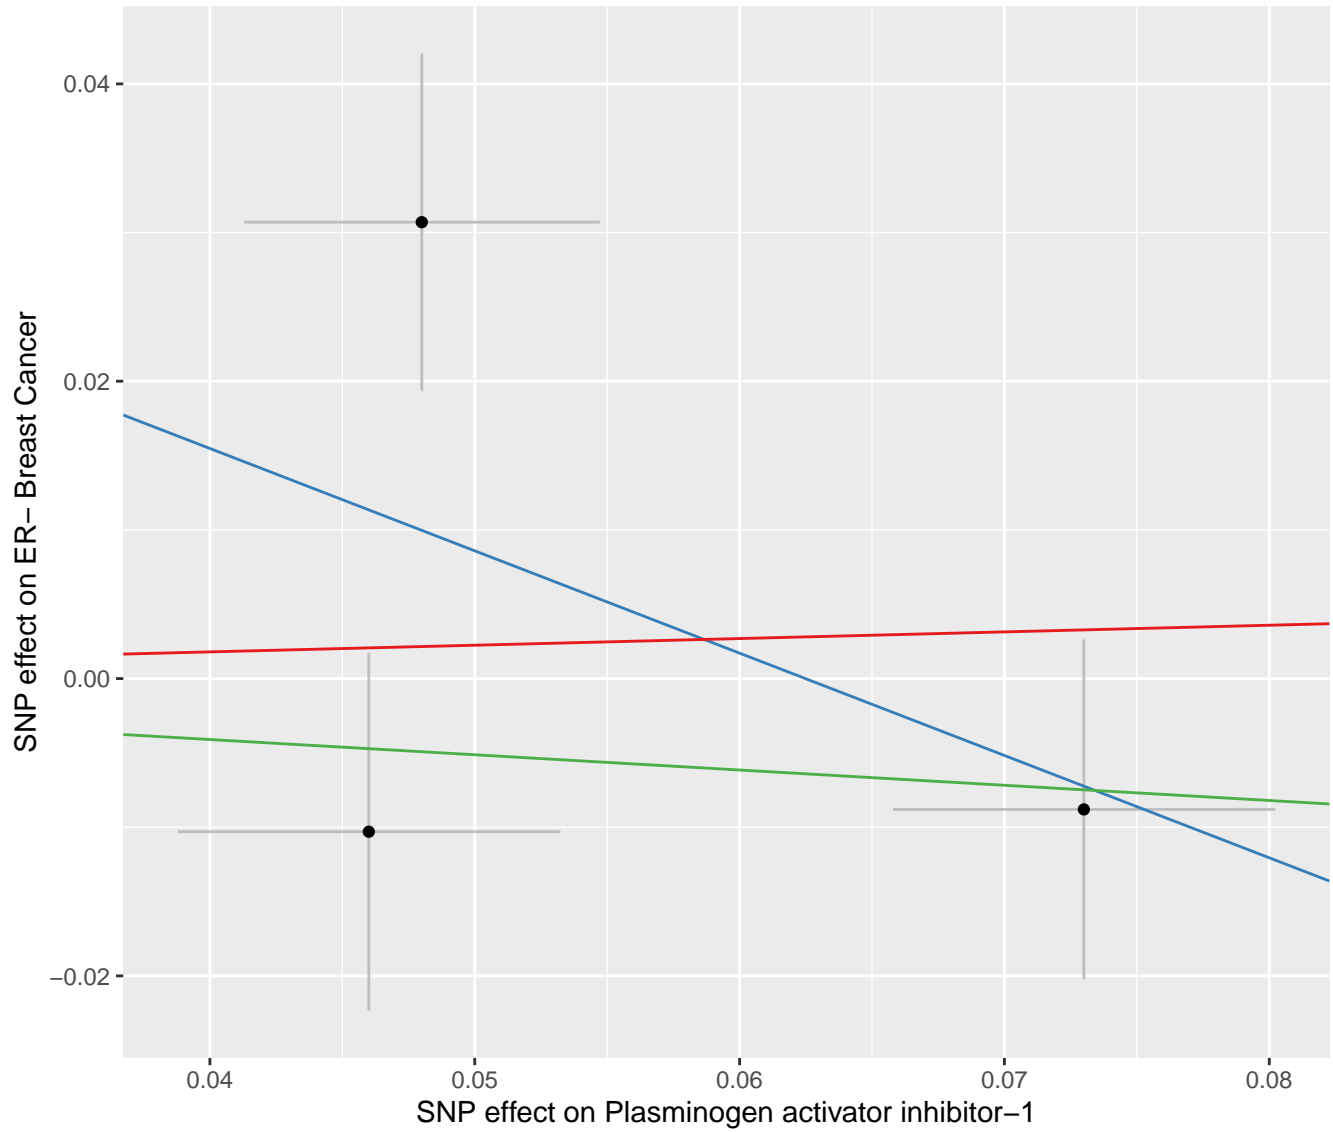

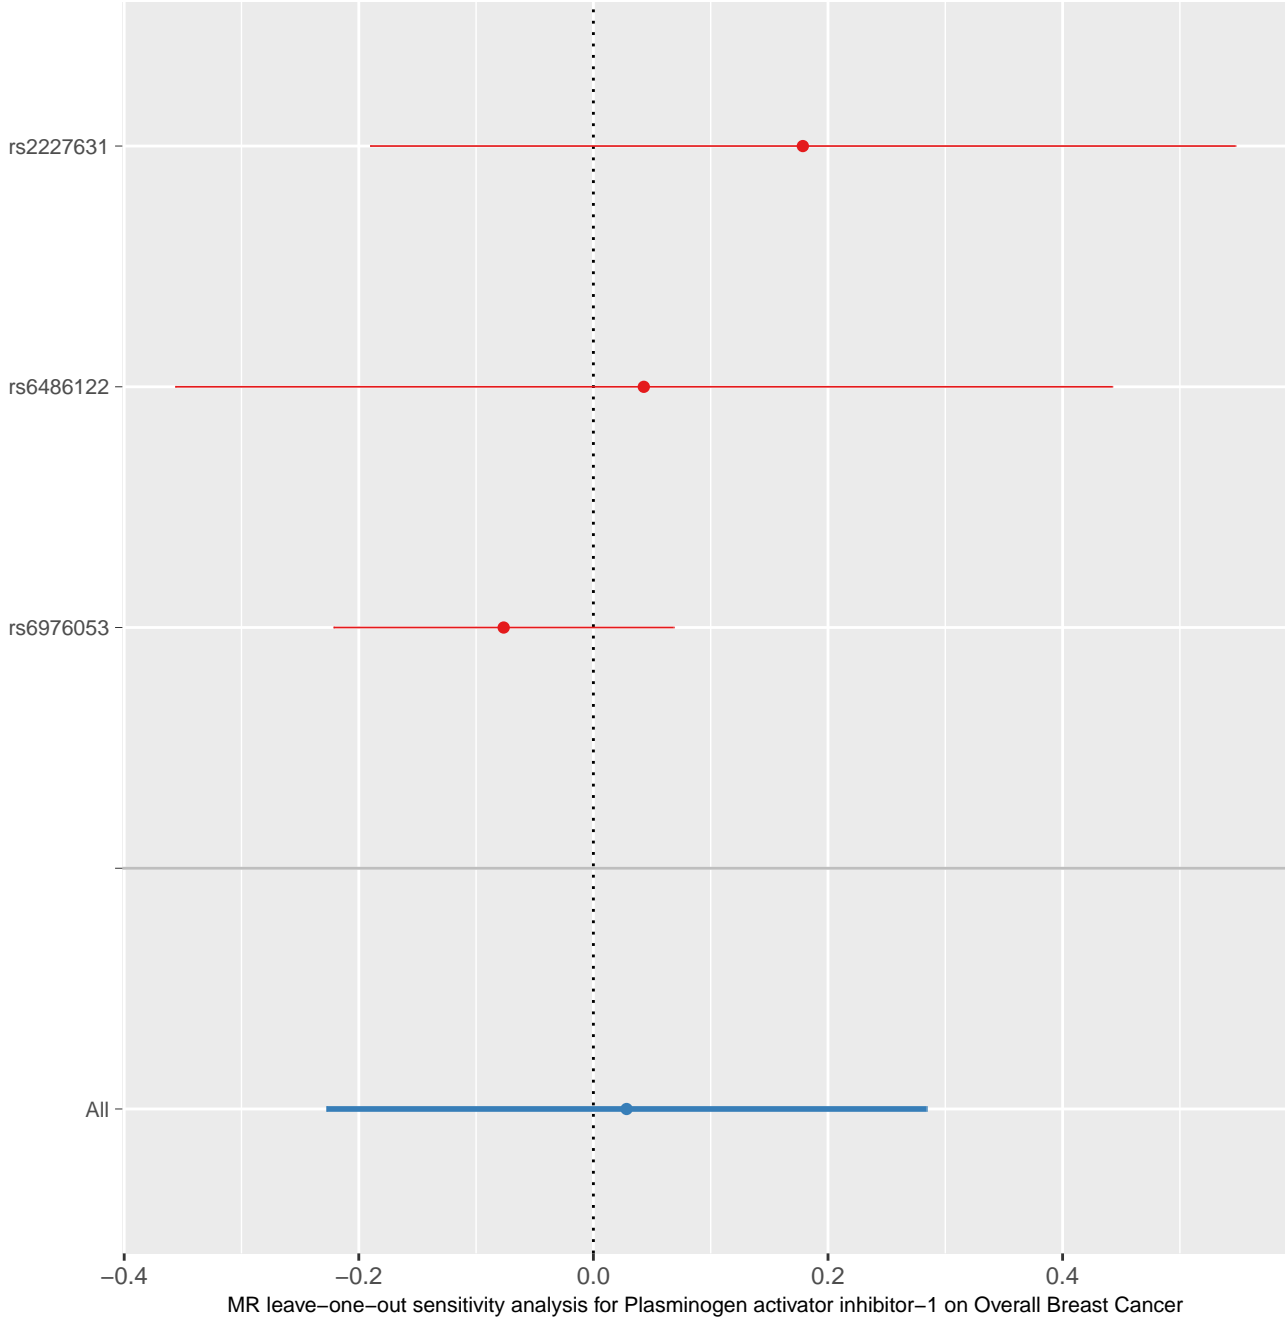

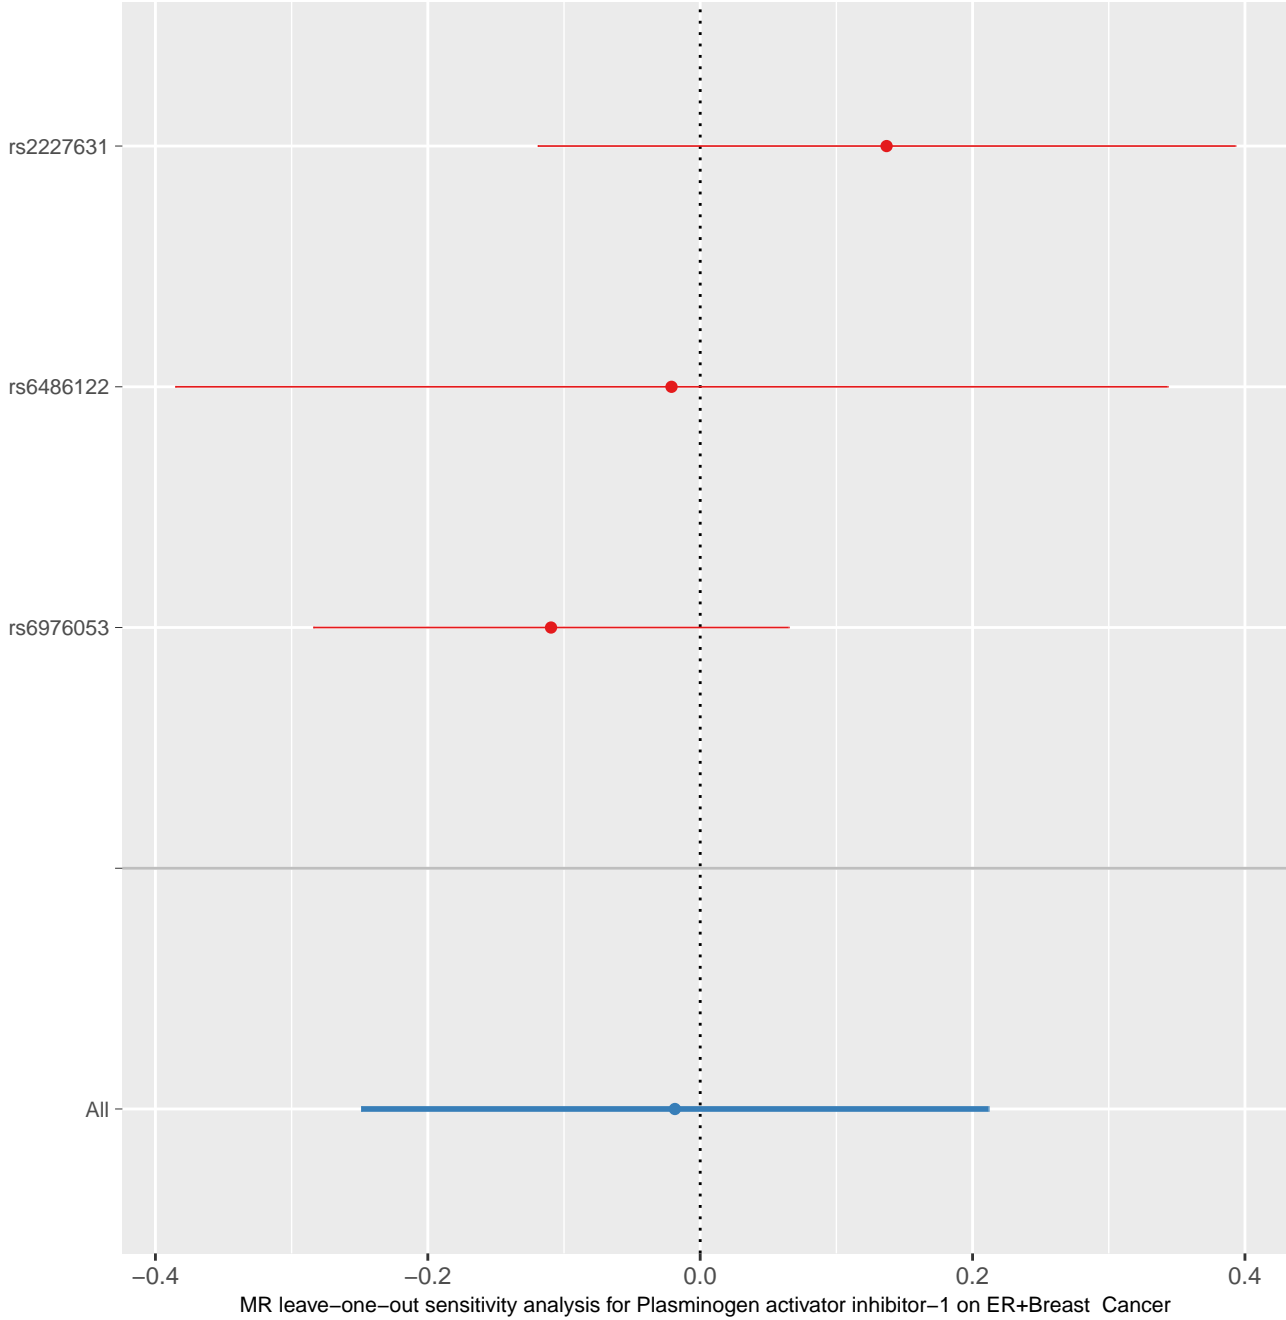

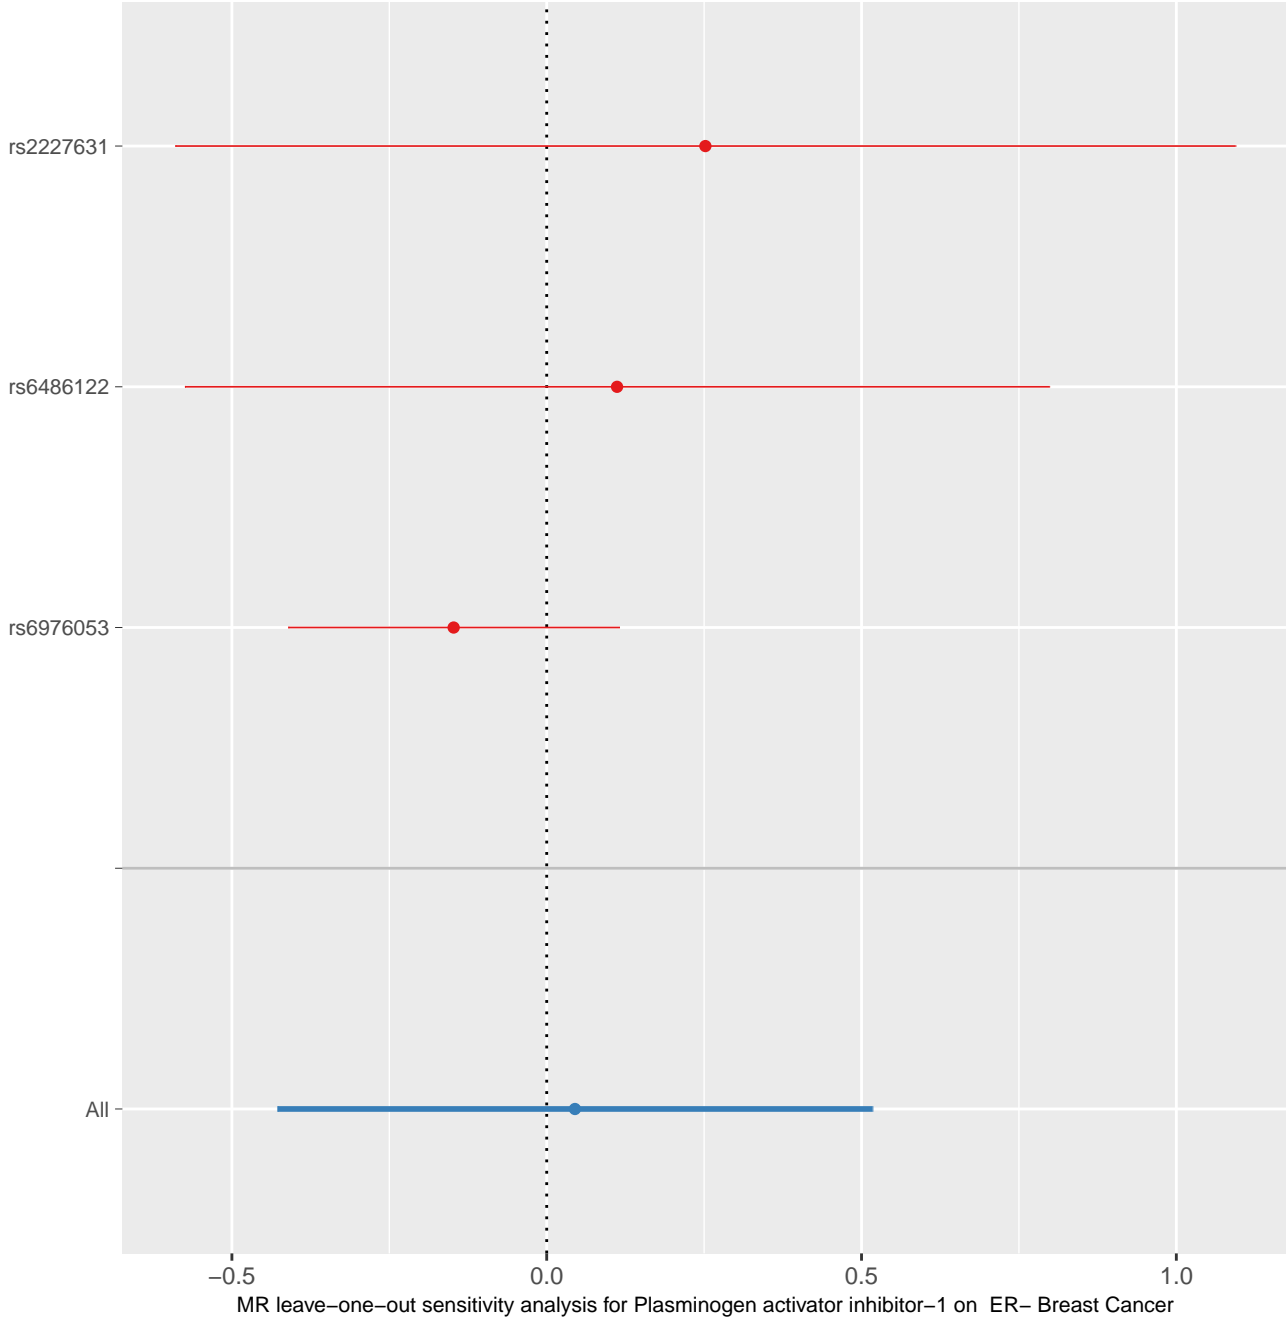



rs6976053

rs6486122

rs2227631

All - Egger

All - IVW

MR forest plot for Plasminogen activator inhibitor-1 on Overall Breast Cancer

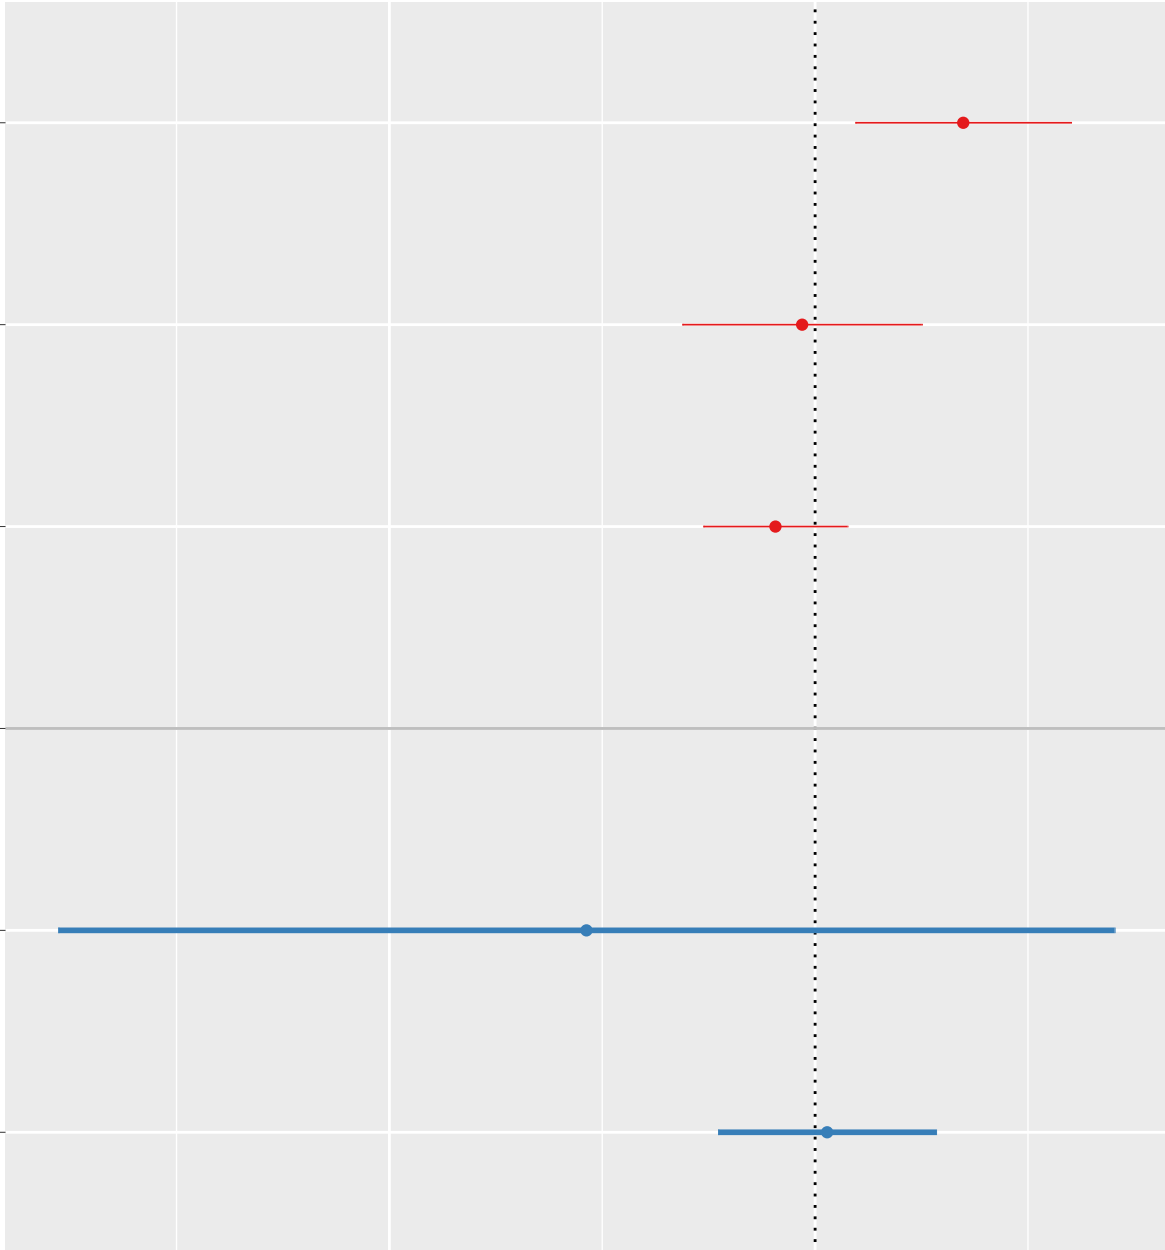

rs6976053

rs6486122

rs2227631

All - Egger

All - IVW

-1.5

-1.0

-0.5

0.0

0.5

MR forest plot for Plasminogen activator inhibitor-1 on ER+ Breast Cancer

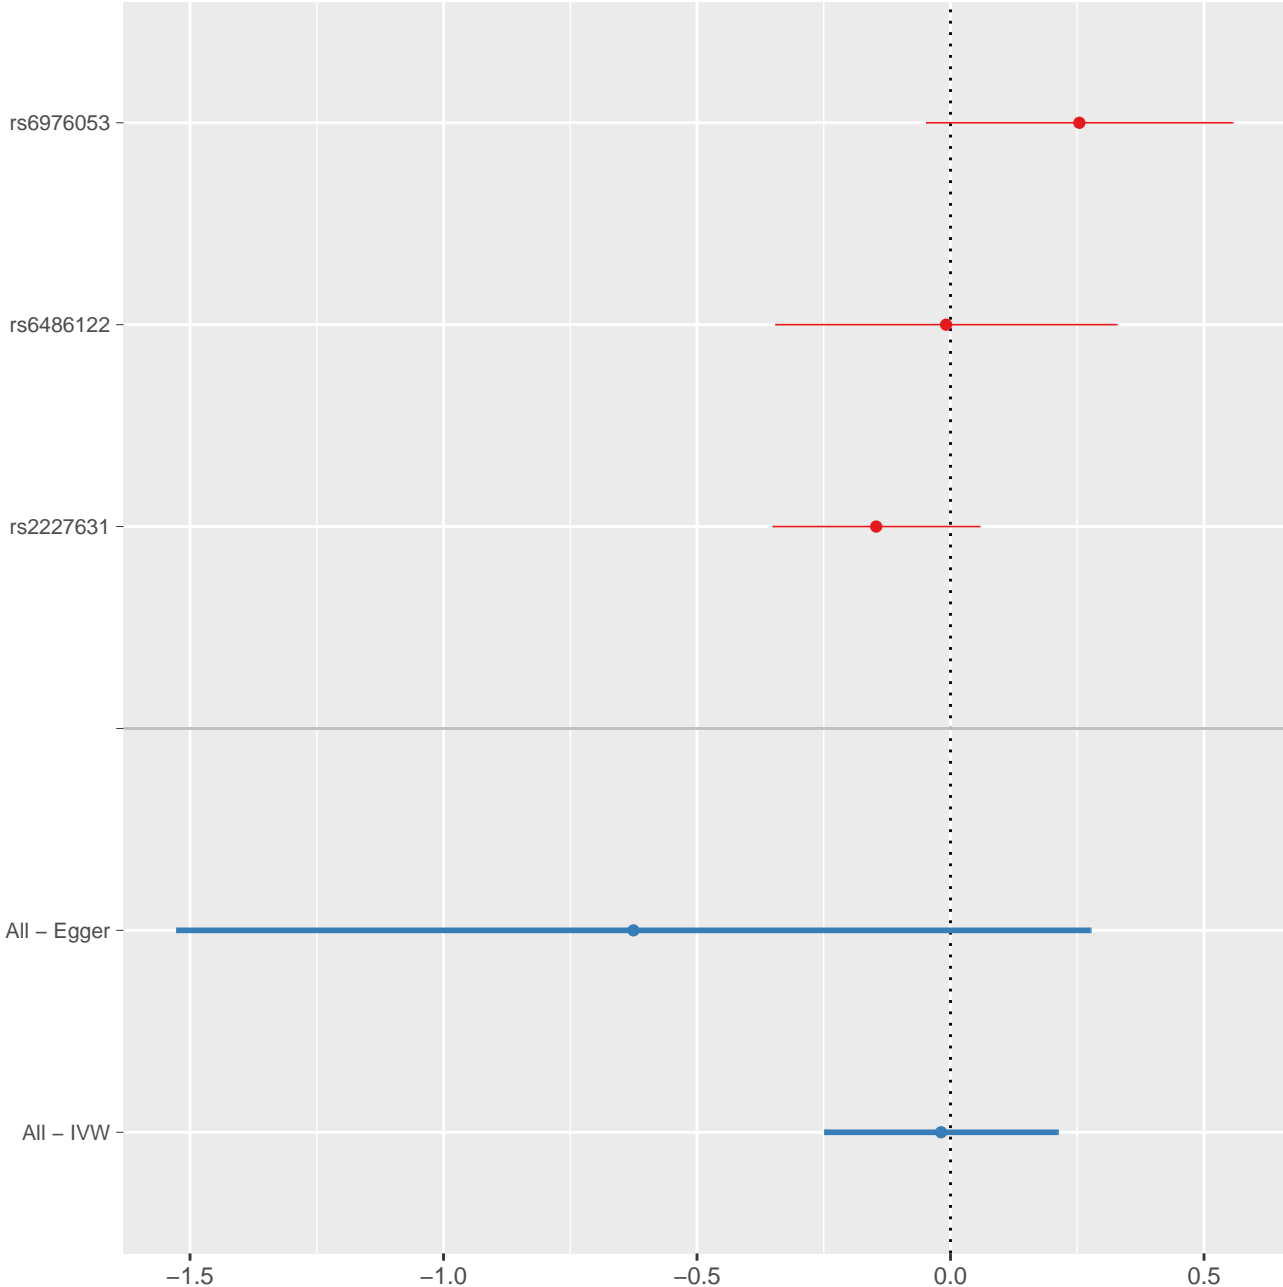

rs6976053

rs2227631

rs6486122

All - Egger

All - IVW

MR forest plot for Plasminogen activator inhibitor-1 on ER- Breast Cancer

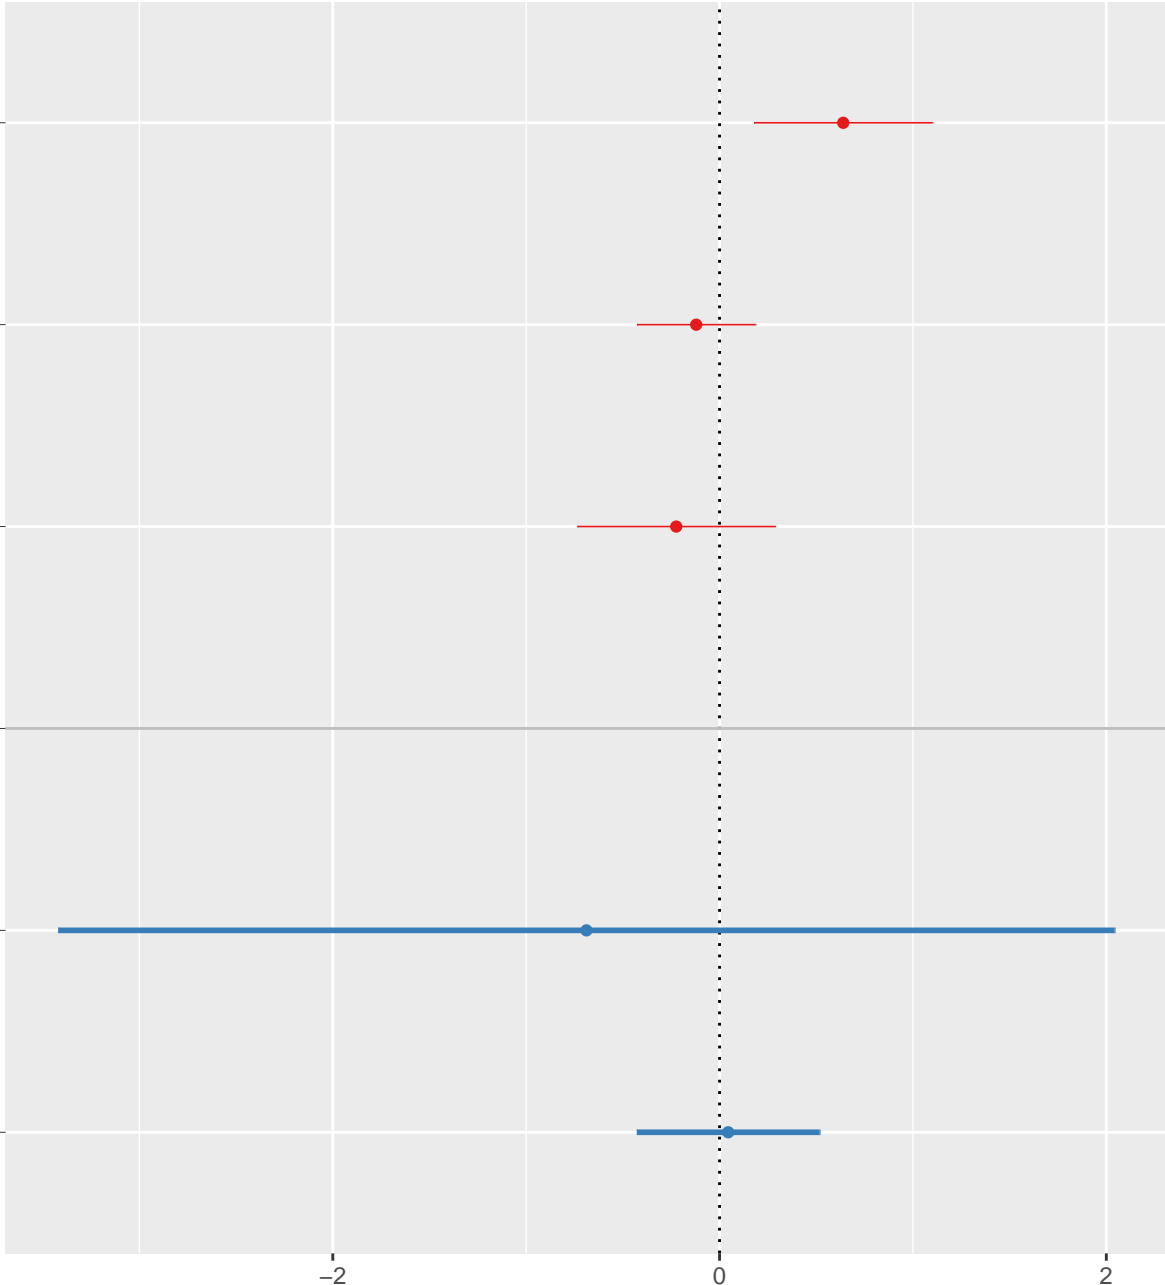

### MR Method

- Inverse variance weighted
- MR Egger

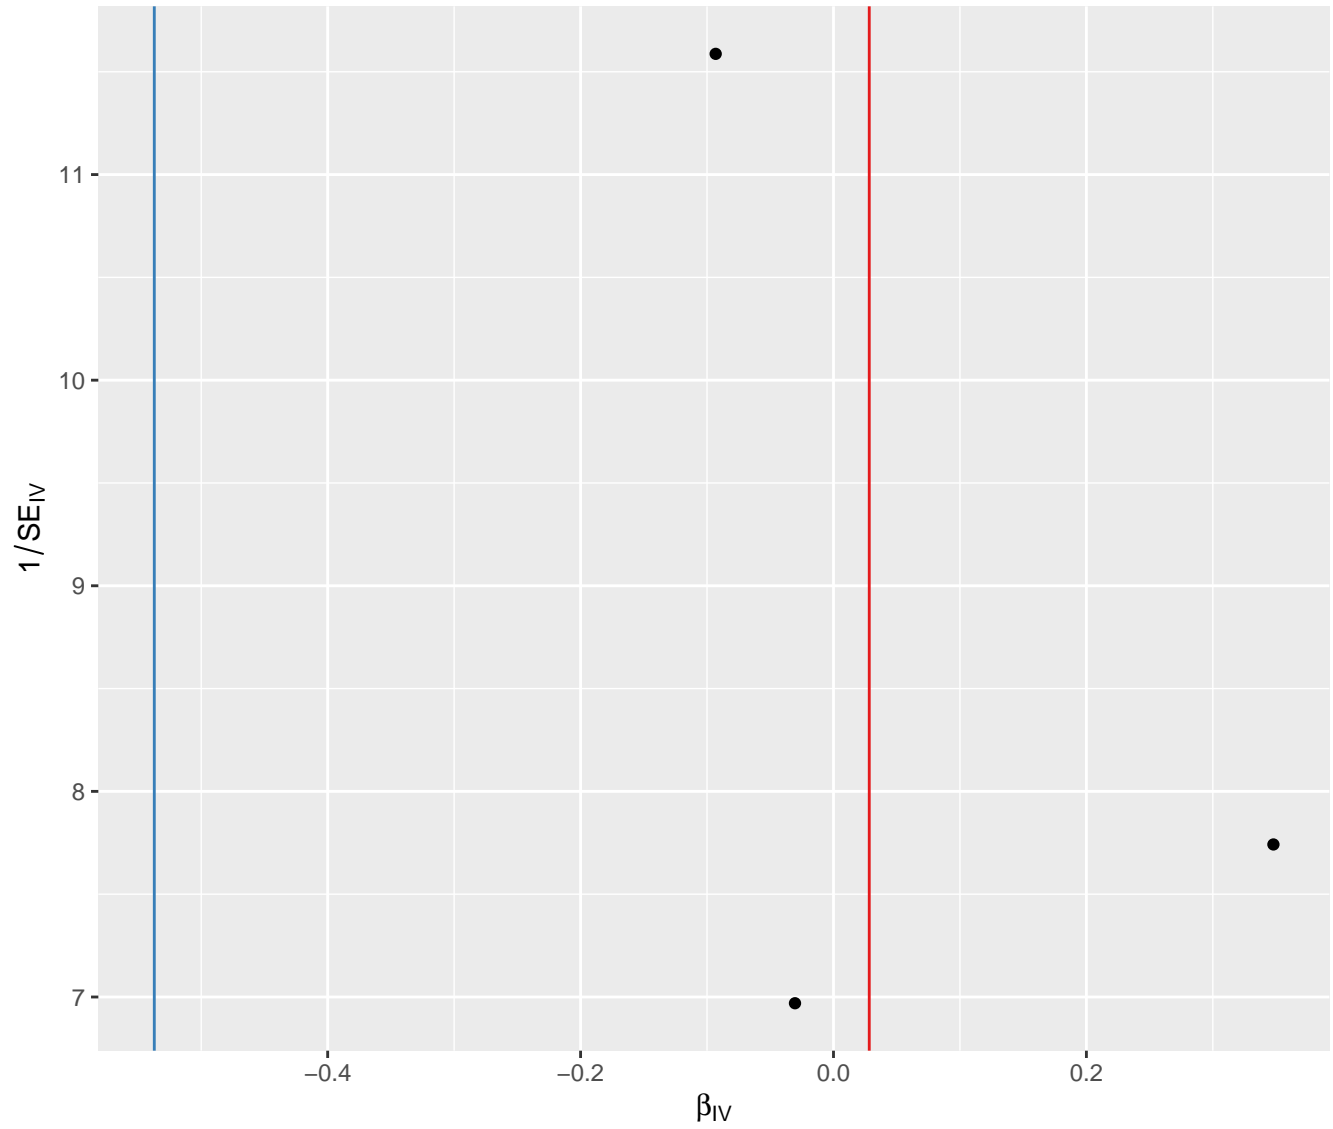

### MR Method

- Inverse variance weighted
- MR Egger

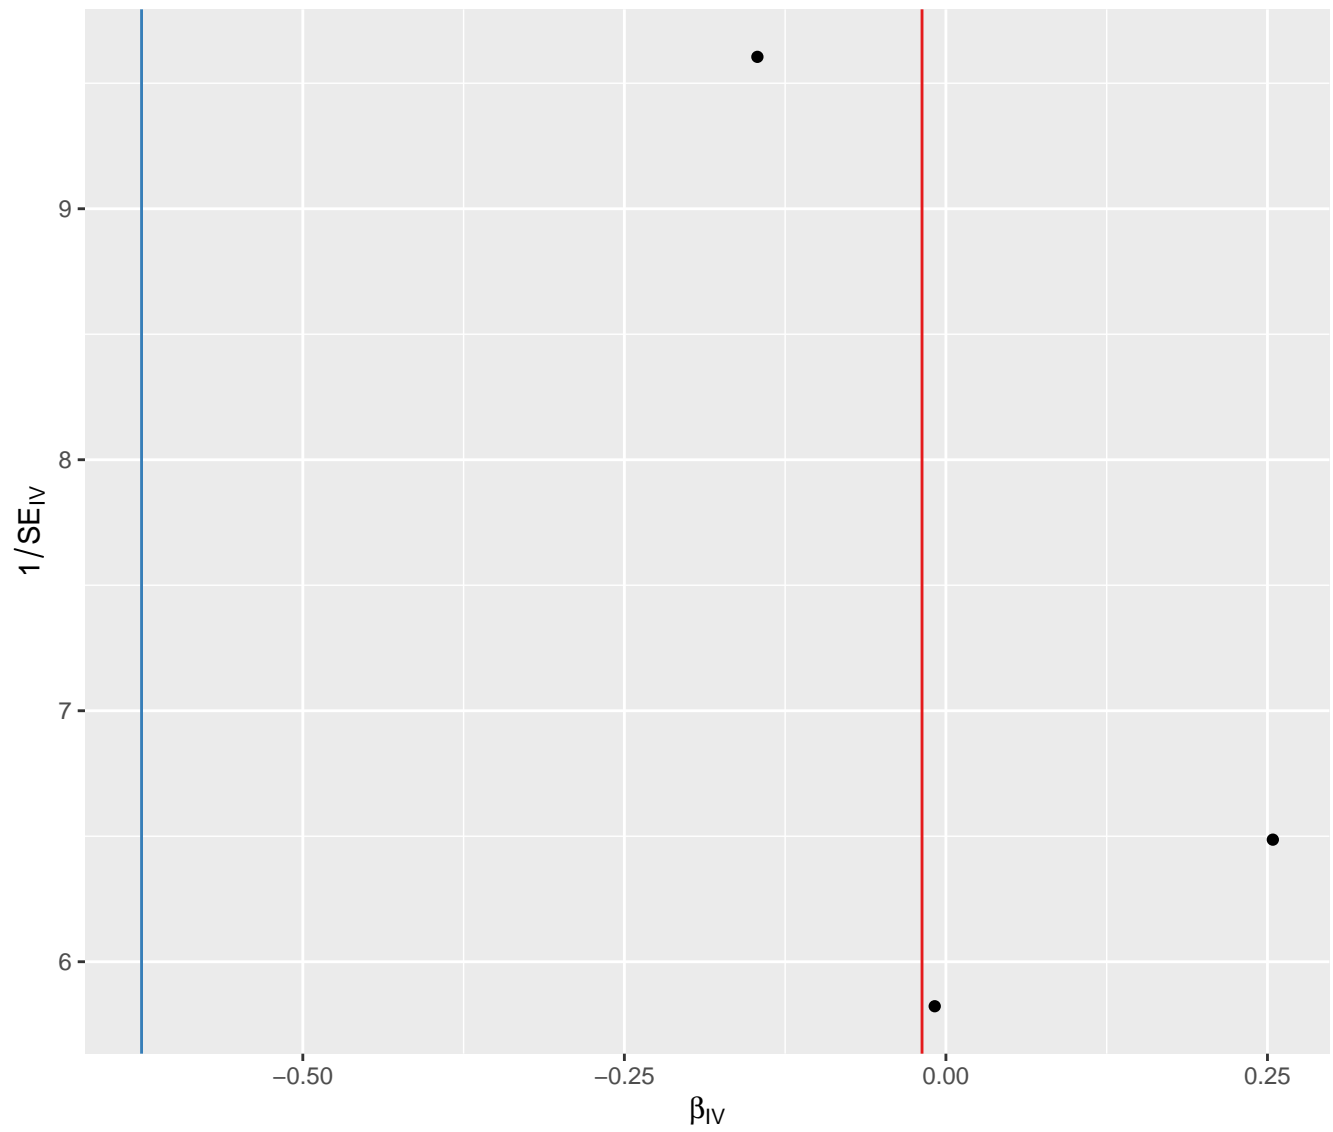

### MR Method

- Inverse variance weighted
- MR Egger

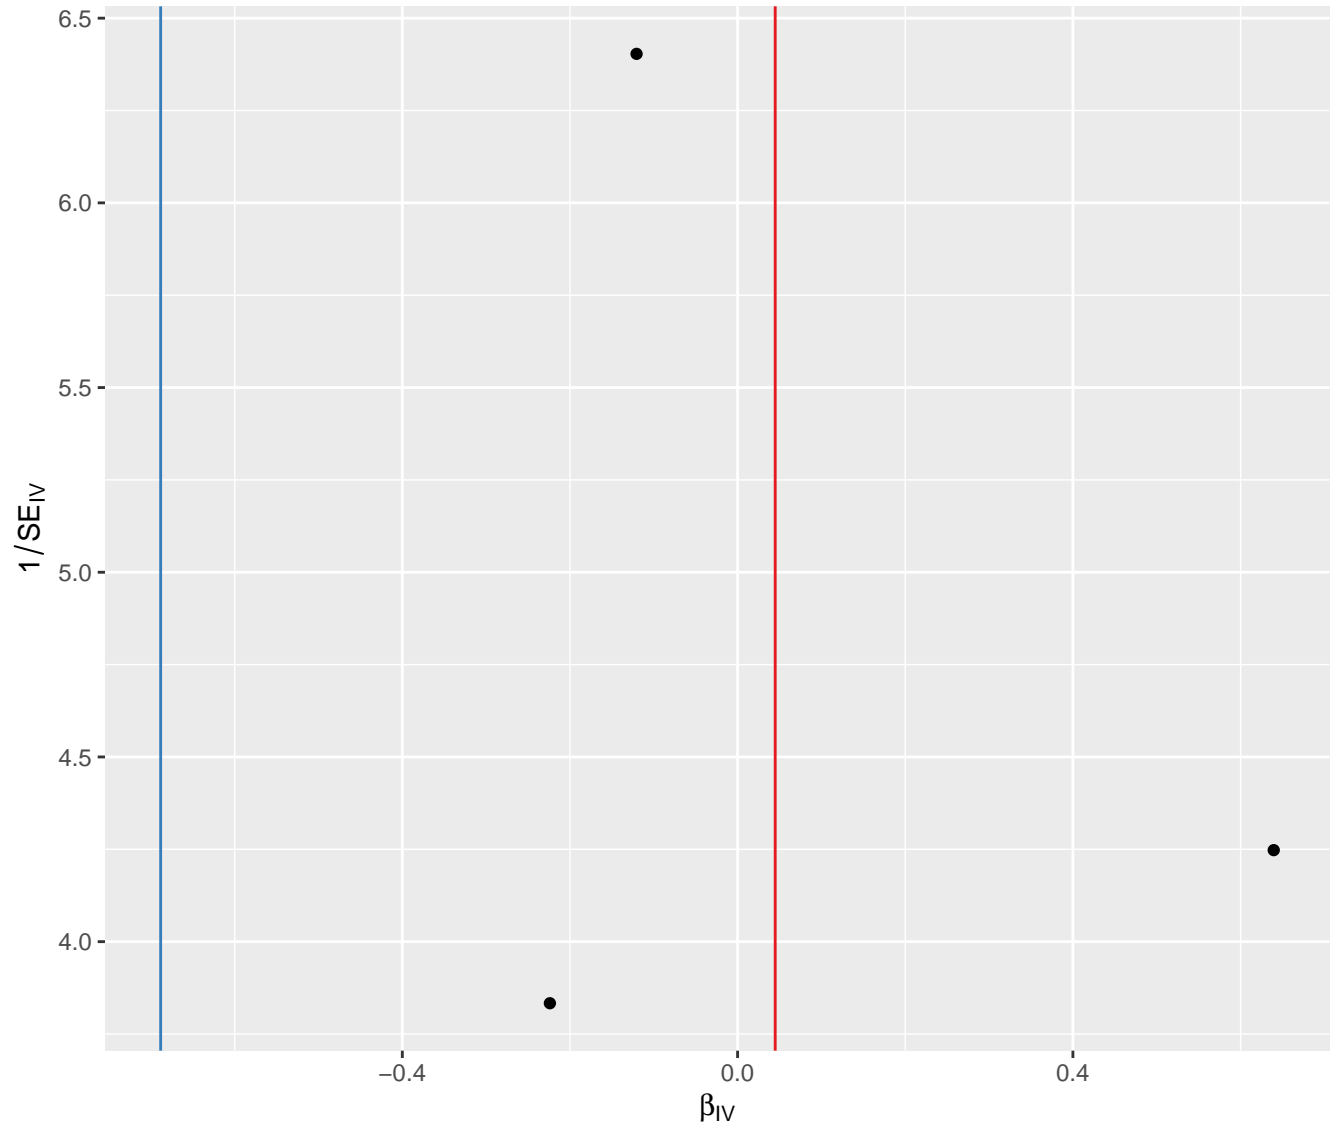

Supplement: IJC-147-1597-s001.pdf [file IJC-147-1597-s001.pdf]
